# Supplementary material for: Combining OSMAC, metabolomic and genomic methods for the production and annotation of halogenated azaphilones and ilicicolins in termite symbiotic fungi
Source: PubMed Central journal article supplement (PMC9569342; doi:10.1038/s41598-022-22256-3), 2022-10-15
Supplement: 41598_2022_22256_MOESM1_ESM.pdf [file 41598_2022_22256_MOESM1_ESM.pdf]

# Combining OSMAC, metabolomic and genomic methods for the production and annotation of halogenated azaphilones and ilicicolins in termite symbiotic fungi

Téo Hebra<sup>1</sup>, Nicolas Pollet<sup>2</sup>, David Touboul<sup>1,3\*</sup>, Véronique Eparvier<sup>1\*</sup>

<sup>1</sup> Université Paris-Saclay, CNRS, Institut de Chimie des Substances Naturelles, UPR 2301, 91198, Gif-sur-Yvette, France.

<sup>2</sup> Université Paris-Saclay, CNRS, IRD, Évolution Génomes Comportement & Écologie, 91198 Gif-sur-Yvette, France.

<sup>3</sup> Laboratoire de Chimie Moléculaire (LCM), CNRS UMR 9168, École Polytechnique, Institut Polytechnique de Paris, 91128 Palaiseau, France

\*emails: [veronique.eparvier@cnrs.fr](mailto:veronique.eparvier@cnrs.fr); [david.touboul@cnrs.fr](mailto:david.touboul@cnrs.fr)

Supplementary data

|                                                                                                                                                                                                                                                                                                                                                         |    |
|---------------------------------------------------------------------------------------------------------------------------------------------------------------------------------------------------------------------------------------------------------------------------------------------------------------------------------------------------------|----|
| Figure S1: Dereplicated ilicicolins structures with their theoretical exact masses and experimental fragmentation spectrum comparison with databases. * represents the amount of H <sub>2</sub> O losses during ionization.....                                                                                                                         | 4  |
| Figure S2: Dereplicated azaphilone structures with their theoretical exact masses and experimental fragmentation spectrum comparison with databases. ....                                                                                                                                                                                               | 8  |
| Figure S3: Cluster comparison of azaphilone biosynthetic gene clusters described in literature with the putative azaphilone biosynthetic gene cluster of <i>Penicillium sclerotiorum</i> SNB-CN111. Only functions of tailoring enzyme related to <i>P. sclerotiorum</i> are annotated. BGC identifier are accession number from MIBIG repository. .... | 16 |
| Figure S4: Cluster comparison of azaphilone biosynthetic gene clusters described in literature with the putative azaphilone biosynthetic gene cluster of <i>Penicillium sclerotiorum</i> SNB-CN111. Only functions of tailoring enzyme related to <i>P. sclerotiorum</i> are annotated. BGC identifier are accession number from MIBIG repository. .... | 19 |
| Figure S5: MS/MS spectra of [ <b>10</b> +H] <sup>+</sup> and the corresponding fragmentation scheme. ....                                                                                                                                                                                                                                               | 20 |
| Figure S6: MS/MS spectra of [ <b>11</b> +H] <sup>+</sup> and the corresponding fragmentation scheme. ....                                                                                                                                                                                                                                               | 20 |
| Figure S7: MS/MS spectra of [ <b>12</b> +H] <sup>+</sup> and the corresponding fragmentation scheme. ....                                                                                                                                                                                                                                               | 21 |
| Figure S8: Comparison of intermediates <b>12</b> and <b>21</b> fragmentation spectra with their common neutral losses corresponding to H/Cl differences. ....                                                                                                                                                                                           | 21 |
| Figure S9: Extracted ion chromatogram of halogenated ilicicolins from scaffold A (H, Cl and Br) with their isotopic patterns.....                                                                                                                                                                                                                       | 23 |
| Figure S10: Extracted ion chromatogram of halogenated ilicicolins from scaffold B (H, Cl and Br) with their isotopic patterns.....                                                                                                                                                                                                                      | 23 |
| Figure S11: Extracted ion chromatogram of halogenated azaphilones from scaffold B' (H, Cl, Br and I) with their isotopic patterns.....                                                                                                                                                                                                                  | 24 |
| Figure S12: Extracted ion chromatogram of halogenated azaphilones from scaffold C' (H, Cl, Br and I) with their isotopic patterns.....                                                                                                                                                                                                                  | 24 |
| Figure S13: Extracted ion chromatogram of halogenated azaphilones from scaffold D' (H, Cl, Br and I) with their isotopic patterns.....                                                                                                                                                                                                                  | 25 |
| Figure S14: Extracted ion chromatogram of halogenated azaphilones from scaffold E' (H, Cl, Br and I) with their isotopic patterns.....                                                                                                                                                                                                                  | 25 |
| Figure S15: HRMS of compound <b>22</b> . ....                                                                                                                                                                                                                                                                                                           | 26 |
| Figure S16: <sup>1</sup> H NMR spectrum (DMF- <i>d</i> <sub>7</sub> ) of compound <b>22</b> . ....                                                                                                                                                                                                                                                      | 29 |
| Figure S17: <sup>13</sup> C NMR spectrum (DMF- <i>d</i> <sub>7</sub> ) of compound <b>22</b> . ....                                                                                                                                                                                                                                                     | 30 |
| Figure S18: COSY NMR spectrum (DMF- <i>d</i> <sub>7</sub> ) of compound <b>22</b> . ....                                                                                                                                                                                                                                                                | 31 |
| Figure S19: HSQC NMR spectrum (DMF- <i>d</i> <sub>7</sub> ) of compound <b>22</b> . ....                                                                                                                                                                                                                                                                | 32 |
| Figure S20: HMBC NMR spectrum (DMF- <i>d</i> <sub>7</sub> ) of compound <b>22</b> . ....                                                                                                                                                                                                                                                                | 33 |
| Figure S21: UV spectra in methanol of isolated azaphilone <b>22</b> . ....                                                                                                                                                                                                                                                                              | 34 |
|                                                                                                                                                                                                                                                                                                                                                         |    |
| Table S1: Dereplicated ilicicolins from <i>N. discophora</i> crude extract. ....                                                                                                                                                                                                                                                                        | 3  |
| Table S2: Dereplicated azaphilones from <i>P. sclerotiorum</i> crude extract. ....                                                                                                                                                                                                                                                                      | 7  |
| Table S3: Basic genomes statistics. ....                                                                                                                                                                                                                                                                                                                | 13 |
| Table S4: BUSCO score. ....                                                                                                                                                                                                                                                                                                                             | 13 |
| Table S5: <i>Ndi_Ili</i> biosynthetic gene cluster annotation.....                                                                                                                                                                                                                                                                                      | 14 |
| Table S6: <i>Ndi_WSC72</i> biosynthetic gene cluster annotation. ....                                                                                                                                                                                                                                                                                   | 15 |
| Table S7: Annotated ilicicolins from <i>N. discophora</i> crude extract, synthesized by <i>Ndi_Ili</i> biosynthetic pathway. ....                                                                                                                                                                                                                       | 17 |
| Table S8: <i>Psc_Aza</i> biosynthetic gene cluster annotation.....                                                                                                                                                                                                                                                                                      | 18 |
| Table S9: Annotated azaphilones from <i>P. sclerotiorum</i> crude extract and fractions, synthesized by <i>Psc_Aza</i> biosynthetic pathway. ....                                                                                                                                                                                                       | 22 |
| Table S10: Comparative <sup>1</sup> H NMR spectroscopic data for compounds <b>22</b> (isolated during this study), sclerotiorin ( <b>4</b> ) sclerotioramine ( <b>5</b> ) and 5-chloroisorotiorin ( <b>6a</b> ) isolated by our group (reference 20 of the manuscript) and <b>6b</b> and <b>15</b> (from literature).....                               | 27 |
| Table S11: Comparative <sup>13</sup> C NMR spectroscopic data for compounds <b>22</b> (isolated during this study), sclerotiorin ( <b>4</b> ) and sclerotioramine ( <b>5</b> ) isolated by our group (reference 20 of the manuscript) and <b>6b</b> and <b>15</b> (from literature).....                                                                | 28 |

Table S1: Dereplicated illicicolins from *N. discophora* crude extract.

| CN63               |             |      |                                                  |                                        |          |              |             |     |
|--------------------|-------------|------|--------------------------------------------------|----------------------------------------|----------|--------------|-------------|-----|
| [M+H] <sup>+</sup> | Error (ppm) | RT   | Formula                                          | Name                                   | Database | Cosine score | Annotation* | Ref |
| 357.2422           | 0.6         | 14.9 | C <sub>23</sub> H <sub>32</sub> O <sub>3</sub>   | LL-Z 1272β                             | GNPS     | 0.91         | Level 2     | 6   |
| 363.2080           | 1.5         | 8.6  | C <sub>22</sub> H <sub>35</sub> ClO <sub>4</sub> | Illicicolinol-2H <sub>2</sub> O        | In-House | 0.92         | Level 1     | 7   |
| 373.2364           | 2.5         | 16.5 | C <sub>23</sub> H <sub>32</sub> O <sub>4</sub>   | Illicicolinic acid B                   | In-House | 0.93         | Level 1     | 8   |
| 373.2373           | 0.0         | 13.2 | C <sub>23</sub> H <sub>32</sub> O <sub>4</sub>   | Illicicolinal G                        | In-House | 0.85         | Level 1     | 7   |
| 389.1867           | 2.8         | 14.7 | C <sub>23</sub> H <sub>31</sub> ClO <sub>4</sub> | Illicicolinal H-H <sub>2</sub> O       | In-House | 0.92         | Level 1     | 7   |
| 389.1873           | 1.3         | 8.5  | C <sub>23</sub> H <sub>35</sub> ClO <sub>6</sub> | Illicicolinic acid E-3H <sub>2</sub> O | In-House | 0.93         | Level 1     | 7   |
| 391.2028           | 1.7         | 15.9 | C <sub>23</sub> H <sub>31</sub> ClO <sub>3</sub> | LL-Z1272α                              | MS-DIAL  | 0.89         | Level 2     | 9   |
| 391.2456           | 5.9         | 11.7 | C <sub>23</sub> H <sub>34</sub> O <sub>5</sub>   | Illicicolinal I                        | In-House | 0.82         | Level 1     | 7   |
| 407.1951           | 8.0         | 17.0 | C <sub>23</sub> H <sub>31</sub> ClO <sub>4</sub> | LL-Z 1272δ                             | MS-DIAL  | 0.69         | Level 2     | 10  |
| 407.1985           | -0.4        | 14.2 | C <sub>23</sub> H <sub>31</sub> ClO <sub>4</sub> | Illicicolinic acid A                   | In-House | 0.93         | Level 1     | 8   |
| 421.1773           | 0.8         | 12.2 | C <sub>23</sub> H <sub>29</sub> ClO <sub>5</sub> | Ascofuranone                           | MS-DIAL  | 0.74         | Level 2     | 11  |
| 425.2082           | 1.7         | 8.5  | C <sub>23</sub> H <sub>33</sub> ClO <sub>5</sub> | Illicicolinic acid C                   | In-House | 0.82         | Level 1     | 8   |

\*Level 0 corresponds annotations from isolated pure compounds; level 1 to annotations by comparison with standards; level 2 to putative annotations (e.g., MS/MS library comparison or tentative structure); level 3 to a chemical class assignment. RT = Retention Time

Figure S1: Dereplicated ilicicolins structures with their theoretical exact masses and experimental fragmentation spectrum comparison with databases (in red  $m/z$  of database, in blue experimental  $m/z$  obtained). \* represents the amount of  $H_2O$  losses during ionization.

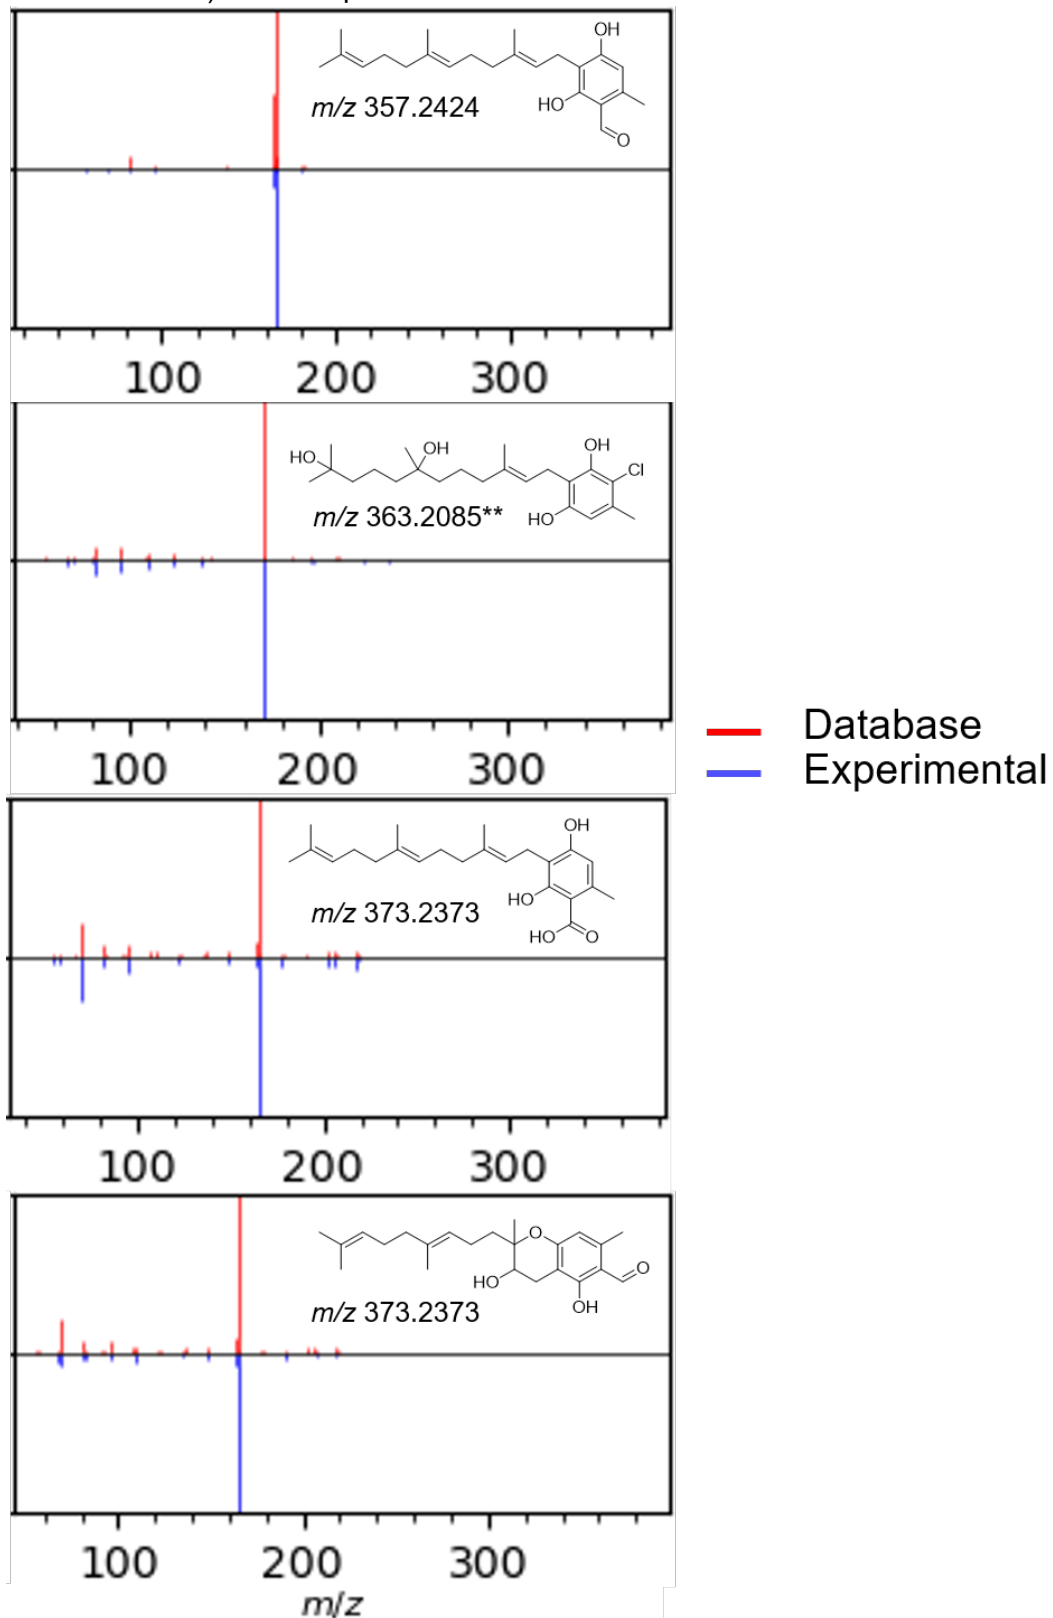

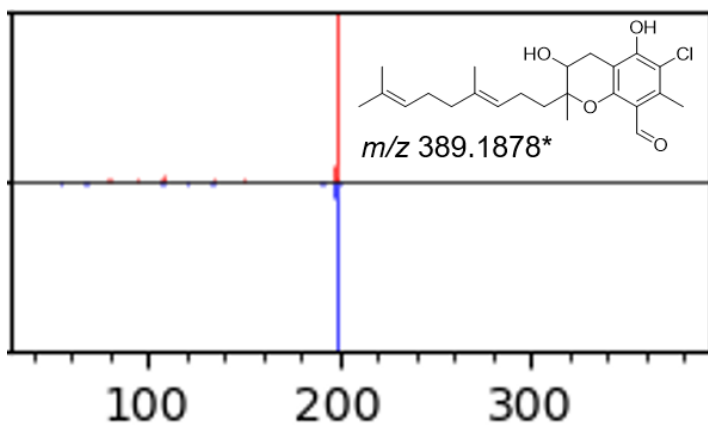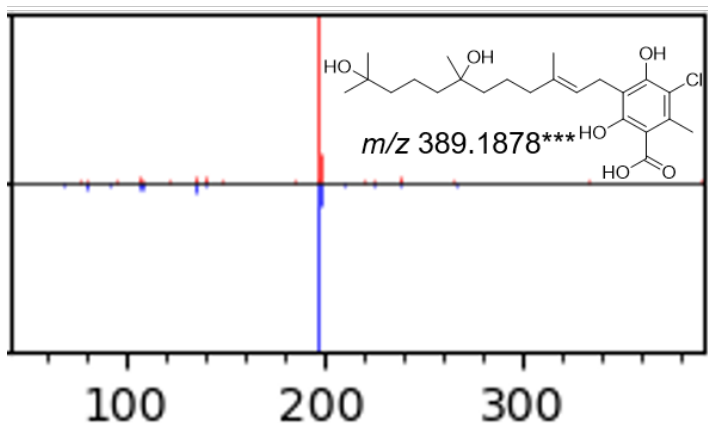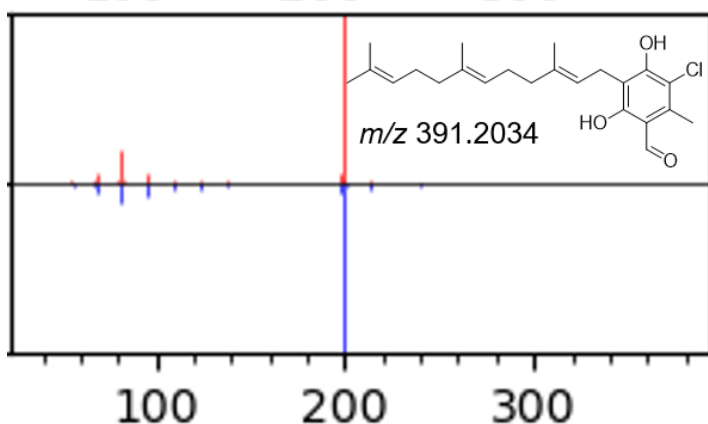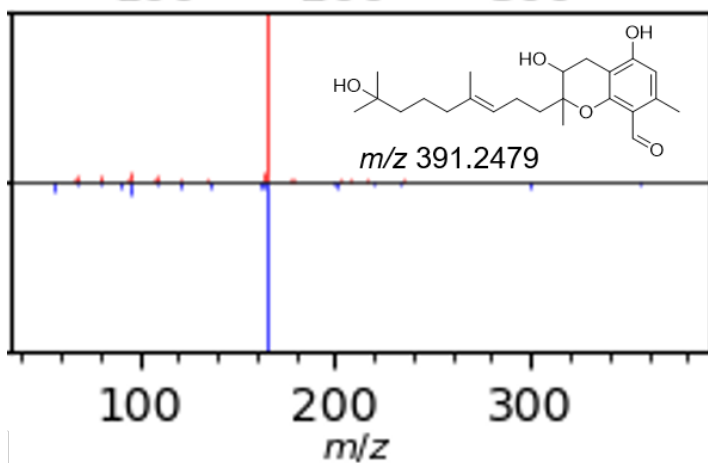

— Database  
— Experimental

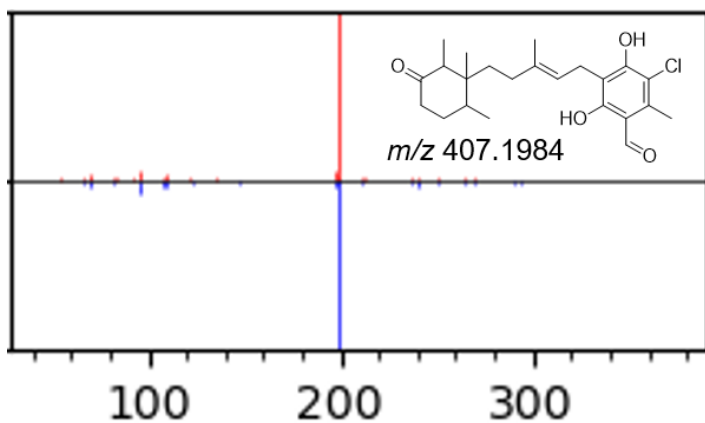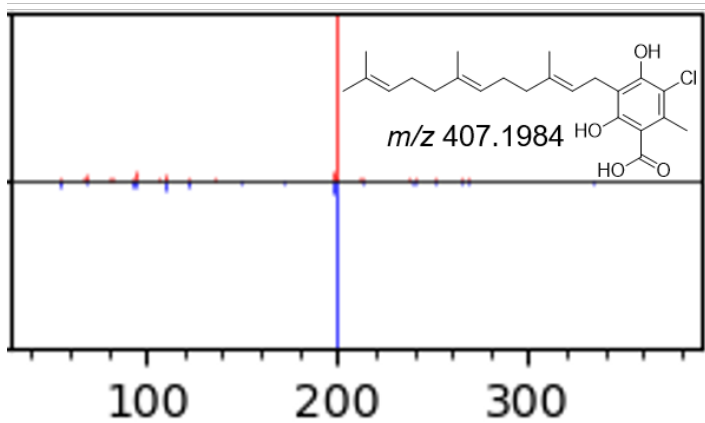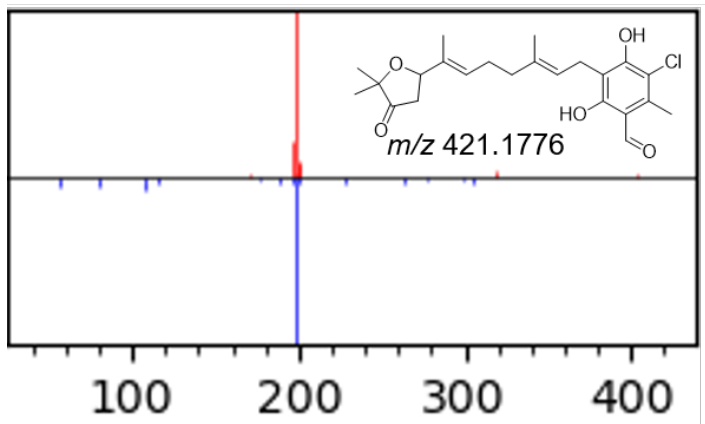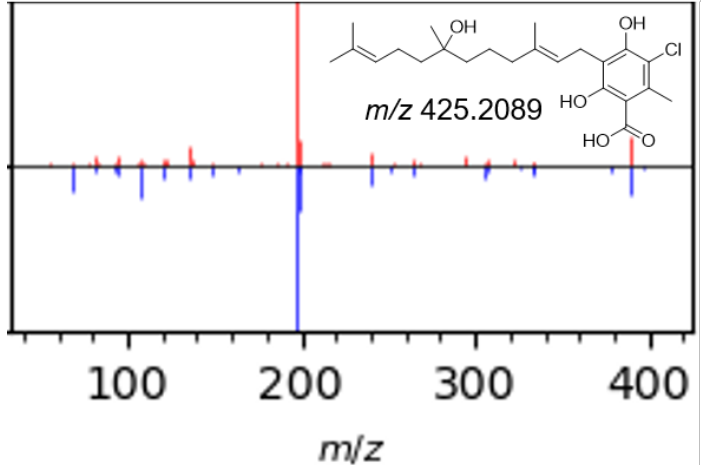

— Database  
— Experimental

Table S2: Dereplicated azaphilones from *P. sclerotiorum* crude extract.

| CN111              |             |                                                   |                     |          |              |             |     |
|--------------------|-------------|---------------------------------------------------|---------------------|----------|--------------|-------------|-----|
| [M+H] <sup>+</sup> | Error (ppm) | Formula                                           | Name                | Database | Cosine score | Annotation* | Ref |
| 349.1202           | -0.3        | C <sub>19</sub> H <sub>21</sub> ClO <sub>4</sub>  |                     | In-House | 0.65         | Level 2     | 1   |
| 356.1853           | 1.0         | C <sub>21</sub> H <sub>25</sub> NO <sub>4</sub>   |                     | In-House | 0.86         | Level 2     | 1   |
| 357.1700           | -1.0        | C <sub>21</sub> H <sub>24</sub> O <sub>5</sub>    |                     | In-House | 0.95         | Level 2     | 1   |
| 359.1857           | -1.1        | C <sub>21</sub> H <sub>26</sub> O <sub>5</sub>    |                     | In-House | 0.74         | Level 2     | 1   |
| 362.1522           | -1.3        | C <sub>20</sub> H <sub>24</sub> ClNO <sub>3</sub> |                     | In-House | 0.88         | Level 2     | 1   |
| 363.1353           | 1.3         | C <sub>20</sub> H <sub>24</sub> ClO <sub>4</sub>  |                     | In-House | 0.85         | Level 2     | 1   |
| 371.1844           | 2.4         | C <sub>22</sub> H <sub>26</sub> O <sub>5</sub>    |                     | In-House | 0.84         | Level 2     | 1   |
| 381.1697           | -0.1        | C <sub>23</sub> H <sub>24</sub> O <sub>5</sub>    | Isorotiorin         | In-House | 0.96         | Level 2     | 2   |
| 385.2007           | 0.7         | C <sub>23</sub> H <sub>28</sub> O <sub>5</sub>    |                     | In-House | 0.92         | Level 2     | 1   |
| 390.1474           | -1.9        | C <sub>21</sub> H <sub>24</sub> ClNO <sub>4</sub> | Sclerotioramine     | MONA     | 0.90         | Level 1     | 1,2 |
| 391.1309           | -0.6        | C <sub>21</sub> H <sub>23</sub> ClO <sub>5</sub>  | Sclerotiorine       | MS-DIAL  | 0.82         | Level 1     | 1,2 |
| 391.2114           | 0.3         | C <sub>22</sub> H <sub>30</sub> O <sub>6</sub>    |                     | In-House | 0.86         | Level 2     | 1   |
| 399.2169           | -0.8        | C <sub>24</sub> H <sub>30</sub> O <sub>5</sub>    |                     | In-House | 0.92         | Level 2     | 1   |
| 404.1627           | -1.0        | C <sub>22</sub> H <sub>26</sub> ClNO <sub>4</sub> |                     | In-House | 0.96         | Level 2     | 1   |
| 405.1468           | -1.2        | C <sub>22</sub> H <sub>25</sub> ClO <sub>5</sub>  | Sclerketide B       | In-House | 0.95         | Level 2     | 1,3 |
| 407.1256           | 0.0         | C <sub>21</sub> H <sub>23</sub> ClO <sub>6</sub>  |                     | In-House | 0.86         | Level 2     | 1   |
| 415.1299           | 1.9         | C <sub>23</sub> H <sub>23</sub> ClO <sub>5</sub>  | 5-Chloroisorotiorin | In-House | 0.93         | Level 1     | 1,2 |
| 417.1902           | 1.4         | C <sub>23</sub> H <sub>28</sub> O <sub>7</sub>    | Geumsanol B         | In-House | 0.86         | Level 2     | 4   |
| 419.1617           | 0.7         | C <sub>23</sub> H <sub>27</sub> ClO <sub>5</sub>  |                     | In-House | 0.94         | Level 2     | 1   |
| 433.1773           | 0.8         | C <sub>24</sub> H <sub>29</sub> ClO <sub>5</sub>  |                     | In-House | 0.69         | Level 2     | 1   |
| 434.1731           | -0.5        | C <sub>23</sub> H <sub>28</sub> ClNO <sub>5</sub> | Isochromophilone VI | MSDIAL   | 0.83         | Level 1     | 1,5 |
| 451.1526           | 1.3         | C <sub>23</sub> H <sub>27</sub> ClO <sub>7</sub>  | Chlorogeumsanol B   | In-House | 0.84         | Level 1     | 1   |
| 500.1839           | -0.9        | C <sub>27</sub> H <sub>30</sub> ClNO <sub>6</sub> |                     | In-House | 0.96         | Level 2     | 1   |

\*Level 0 corresponds annotations from isolated pure compounds; level 1 to annotations by comparison with standards; level 2 to putative annotations (e.g., MS/MS library comparison or tentative structure); level 3 to a chemical class assignment.

Figure S2: Dereplicated azaphilone structures with their theoretical exact masses and experimental fragmentation spectrum comparison with databases.

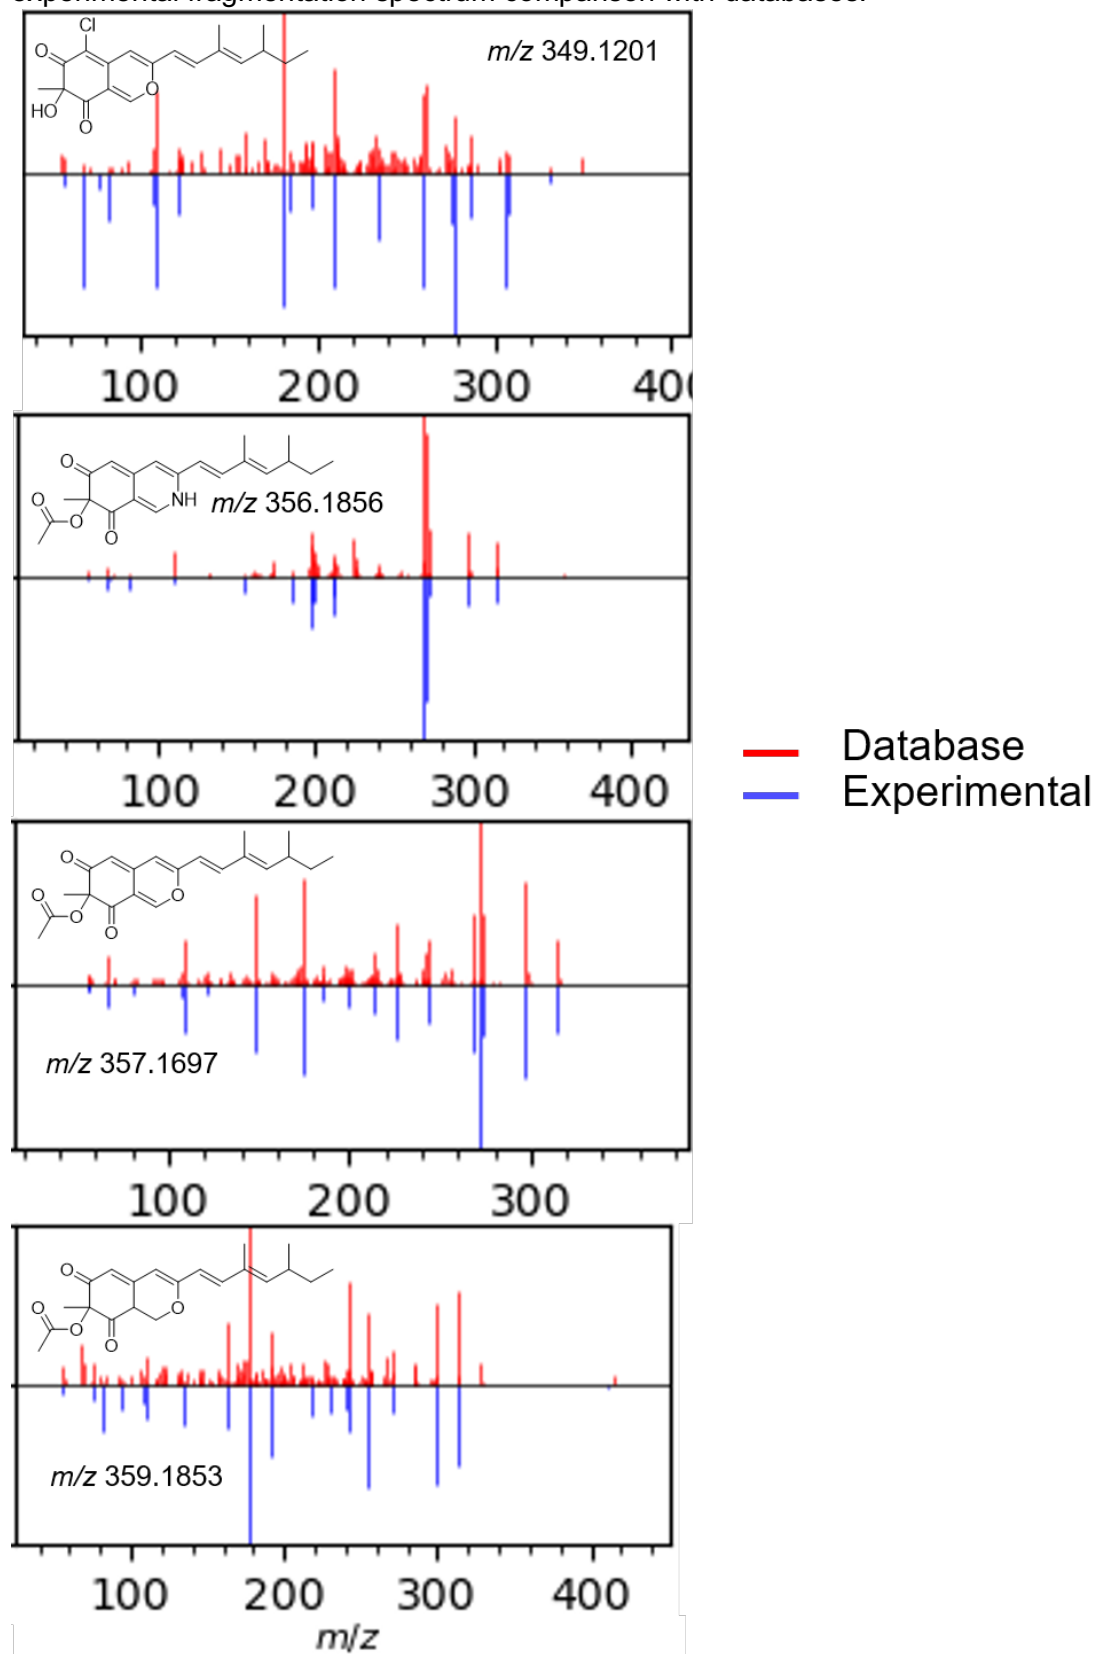



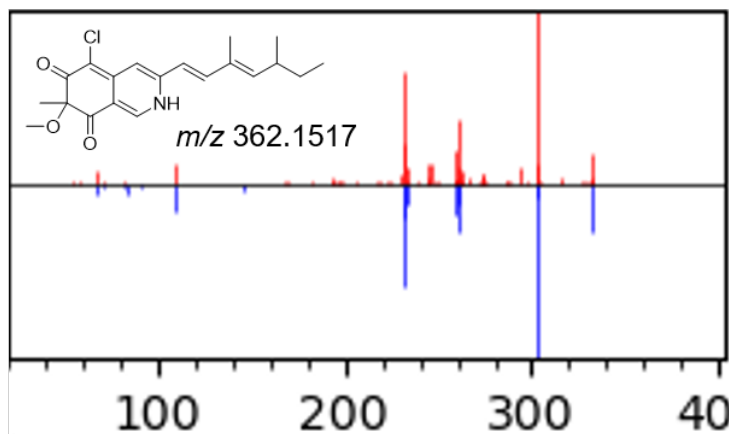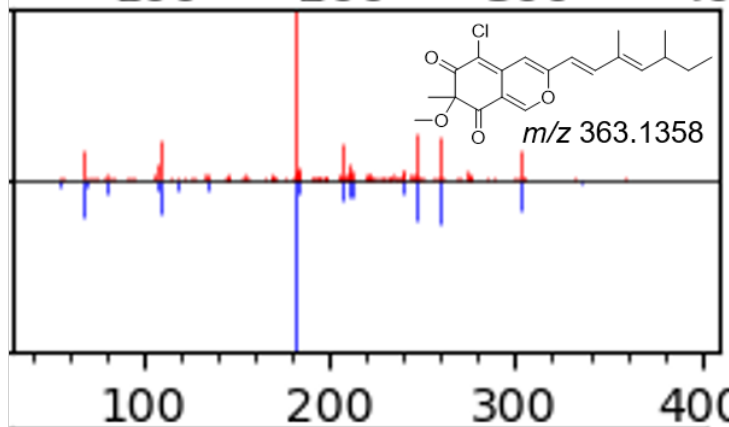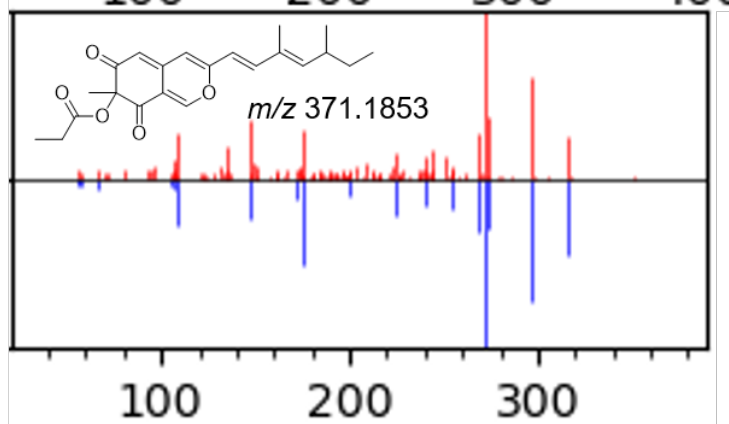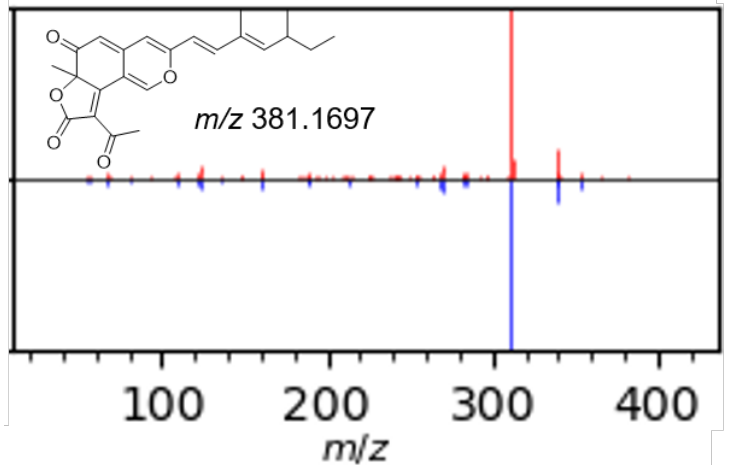

— Database  
— Experimental

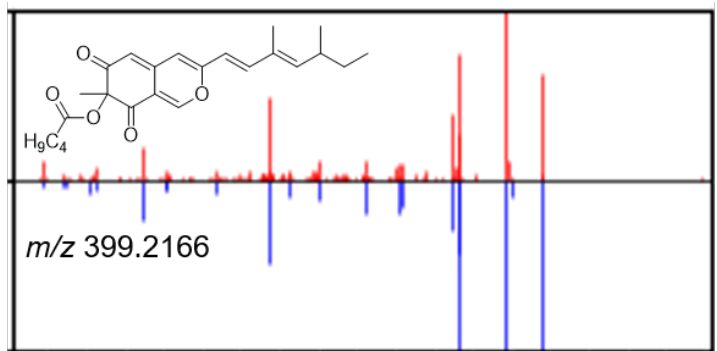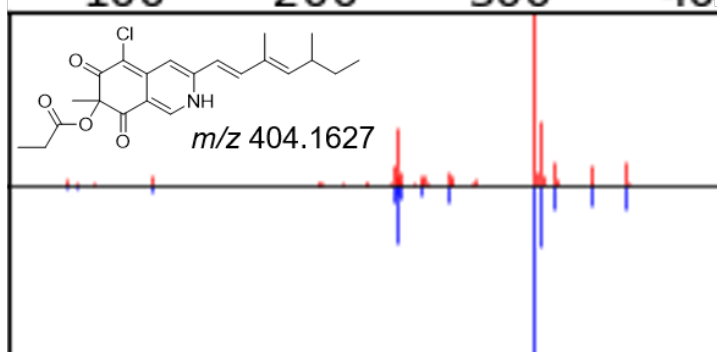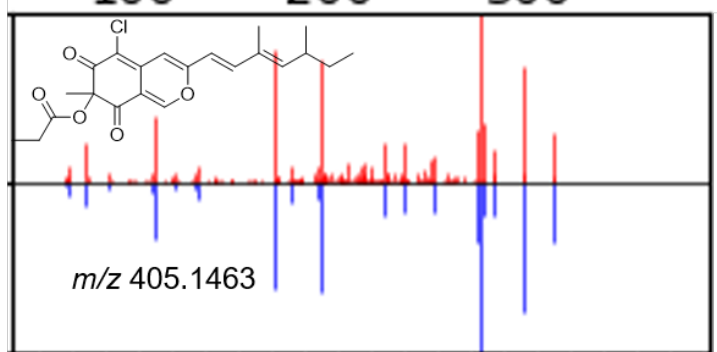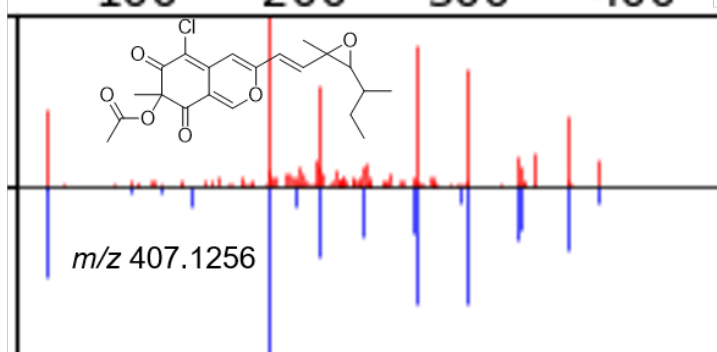

— Database  
— Experimental

$m/z$

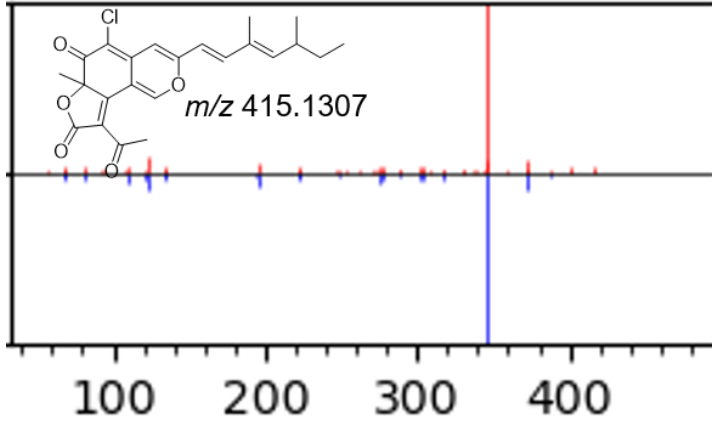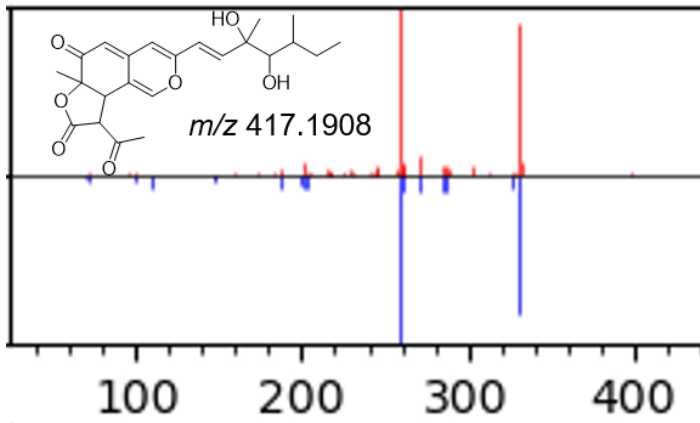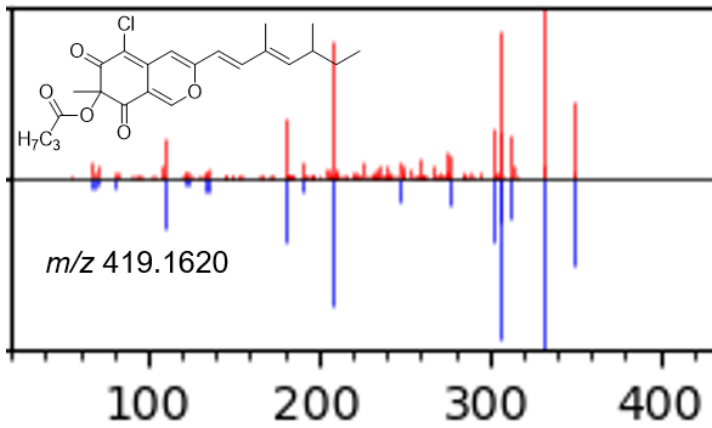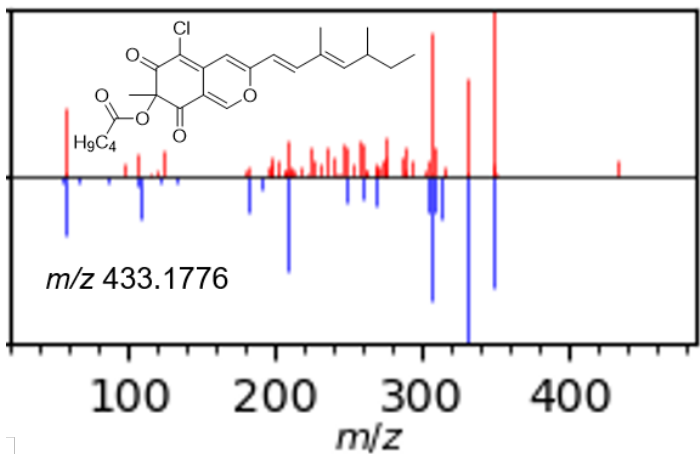

— Database  
— Experimental

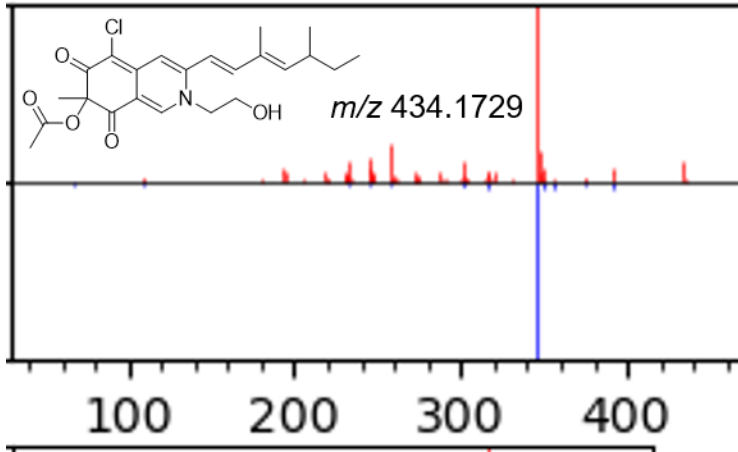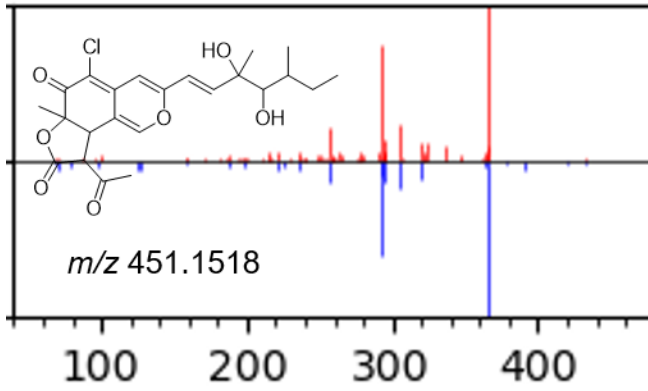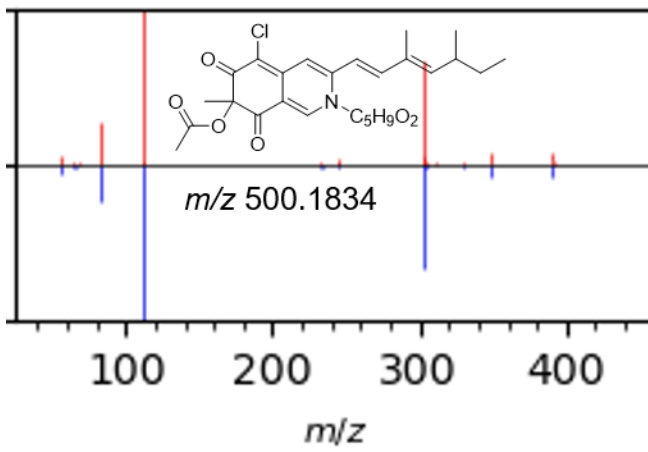

— Database  
— Experimental

Table S3: Basic genomes statistics.

|                                 | Genome size (Mpb) | Contigs | N50 (Mpb) | N75 (Mpb) | L50 (contigs) | L75 (contigs) | %GC  |
|---------------------------------|-------------------|---------|-----------|-----------|---------------|---------------|------|
| <i>Neonectria discophora</i>    | 41.6              | 26      | 4.03      | 3.02      | 3             | 8             | 54.2 |
| <i>Penicillium sclerotiorum</i> | 34.7              | 10      | 4.34      | 3.95      | 4             | 6             | 48.3 |

Table S4: BUSCO score.

| Gene                            | Complete        |                | Fragmented (%) | Missing (%) |
|---------------------------------|-----------------|----------------|----------------|-------------|
|                                 | Single copy (%) | Duplicated (%) |                |             |
| <i>Neonectria discophora</i>    | 99.3            | 0.0            | 0.0            | 0.7         |
| <i>Penicillium sclerotiorum</i> | 97.6            | 0.7            | 0.0            | 1.7         |

Table S5: *Ndi\_Ili* biosynthetic gene cluster annotation.

| Gene name | Size (AA) | Best match Swissprot       | Global alignment (I/S/G) % | Global alignment (I/S/G) AA | domain                                                                                                 | _ID                                                              | Plausible function                                      | Duplicated |
|-----------|-----------|----------------------------|----------------------------|-----------------------------|--------------------------------------------------------------------------------------------------------|------------------------------------------------------------------|---------------------------------------------------------|------------|
| Ndi_Ili_A | 2014      | <a href="#">A0A455R5P9</a> | 56/70/8                    | 1201/1506/179               | beta-ketoacyl synthase<br>acyl transferase<br>product template<br>acyl carrier protein<br>thioesterase | PF00109.26<br>PF00698.21<br>TIGR04532<br>PF00550.25<br>IPR001031 | Non reducing<br>polyketide<br>synthase                  | N          |
| Ndi_Ili_B | 297       | <a href="#">A0A455R413</a> | 49/59/16                   | 167/203/55                  | prenyltransferase                                                                                      | PF01040.18                                                       | Prenyltransferase                                       | N          |
| Ndi_Ili_C | 1065      | <a href="#">A0A455R7E6</a> | 60/75/4                    | 662/826/40                  | AMP-binding,<br>NAD dependent<br>epimerase/dehydratase                                                 | PF00501.28<br>PF01370.21                                         | Non-canonical<br>non-ribosomal<br>peptide<br>synthetase | N          |
| Ndi_Ili_D | 553       | <a href="#">A0A455R7M0</a> | 68/79/5                    | 387/447/31                  | tryptophan halogenase                                                                                  | PF04820.14                                                       | FAD dependant<br>halogenase                             | N          |
| Ndi_Ili_E | 674       | No reviewed protein        |                            |                             | sugar (and other) transporter,<br>major facilitator                                                    | PF00083.24<br>PF07690.16                                         | Transporter                                             | N          |
| Ndi_Ili_F | 451       | No reviewed protein        |                            |                             | ATPase family associated with<br>various cellular activities                                           | PF00004.29                                                       | ATPase                                                  | N          |
| Ndi_Ili_G | 532       | No reviewed protein        |                            |                             |                                                                                                        |                                                                  |                                                         | N          |
| Ndi_Ili_H | 418       | No reviewed protein        |                            |                             |                                                                                                        |                                                                  |                                                         | N          |
| Ndi_Ili_I | 442       | No reviewed protein        |                            |                             |                                                                                                        |                                                                  | unknown function                                        | N          |
| Ndi_Ili_J | 782       | No reviewed protein        |                            |                             |                                                                                                        |                                                                  | unknown function                                        | N          |

I: identity, S: similarity, G: gap

Table S6: *Ndi\_WSC72* biosynthetic gene cluster annotation.

| Gene name   | Size (AA) | Best match Swissprot       | Global alignment (I/S/G) % | Global alignment (I/S/G) AA | domain                                                                            | _ID                                                   | Plausible function               | Duplicated |
|-------------|-----------|----------------------------|----------------------------|-----------------------------|-----------------------------------------------------------------------------------|-------------------------------------------------------|----------------------------------|------------|
| Ndi_WSC72_A | 1786      | <a href="#">C5FM57</a>     | 56/70/5                    | 1030/1296/96                | ketoacyl synthase<br>acyl transferase<br>product template<br>acyl carrier protein | PF00109.26<br>PF00698.21<br>TIGR04532.6<br>PF00550.25 | Non reducing polyketide synthase | N          |
| Ndi_WSC72_B | 556       | <a href="#">Q2UPC7</a>     | 57/72/5                    | 322/408/31                  | tryptophan halogenase                                                             | PF04820.14                                            | FAD dependant halogenase         | N          |
| Ndi_WSC72_C | 220       | No reviewed protein        |                            |                             | glutathione S-transferase                                                         | IPR040079                                             | Glutathione S-transferase        | N          |
| Ndi_WSC72_D | 337       | <a href="#">G3KLH5</a>     | 54/71/3                    | 174/227/11                  | $\beta$ -lactamase                                                                | PF00753                                               | $\beta$ -lactamase               | N          |
| Ndi_WSC72_E | 378       | <a href="#">Q9P900</a>     | 39/58/4                    | 150/227/14                  | O-methyltransferase                                                               | PF00891                                               | methyltransferase                | N          |
| Ndi_WSC72_F | 516       | No reviewed protein        |                            |                             | copper oxidase                                                                    | PF00394<br>PF07731                                    | unknown function                 | N          |
| Ndi_WSC72_G | 261       | <a href="#">A0A179G9G5</a> | 37/44/45                   | 164/194/198                 | zinc finger                                                                       | PF00172                                               | Transcription factor             | N          |
| Ndi_WSC72_H | 427       | No reviewed protein        |                            |                             | monooxygenases                                                                    | PF01494                                               | monooxygenase                    | N          |
| Ndi_WSC72_I | 532       | No reviewed protein        |                            |                             |                                                                                   |                                                       | unknown function                 | N          |
| Ndi_WSC72_J | 413       | No reviewed protein        |                            |                             |                                                                                   |                                                       | unknown function                 | N          |
| Ndi_WSC72_K | 292       | No reviewed protein        |                            |                             |                                                                                   |                                                       | unknown function                 | N          |
| Ndi_WSC72_L | 918       | No reviewed protein        |                            |                             |                                                                                   |                                                       | unknown function                 | N          |

Figure S3: Cluster comparison of azaphilone biosynthetic gene clusters described in literature with the putative azaphilone biosynthetic gene cluster of *Penicillium sclerotiorum* SNB-CN111. Only functions of tailoring enzyme related to *P. sclerotiorum* are annotated. BGC identifier are accession number from MIBIG repository. Clinker Software (<https://github.com/gamcil/clinker>).

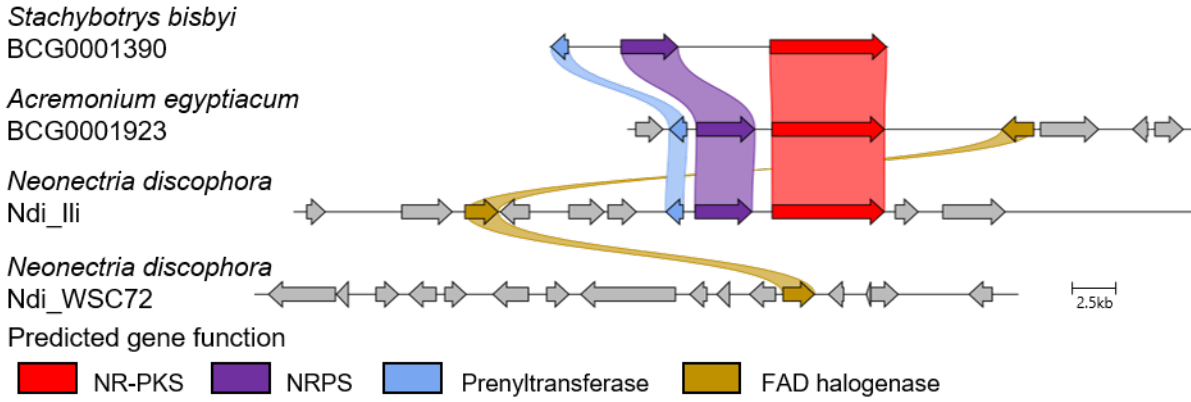



Table S7: Annotated ilicicolins from *N. discophora* crude extract, synthesized by *Ndi\_III* biosynthetic pathway.

| CN63 |                    |             |                                                  |                                 |     |
|------|--------------------|-------------|--------------------------------------------------|---------------------------------|-----|
| ID   | [M+H] <sup>+</sup> | Error (ppm) | Formula                                          | Identification                  | Ref |
| 9    | 373.2364           | 2.5         | C <sub>23</sub> H <sub>32</sub> O <sub>4</sub>   | Dereplication, standard         | 8   |
| 2    | 407.1985           | 1.1         | C <sub>23</sub> H <sub>31</sub> ClO <sub>4</sub> | Dereplication, standard         | 8   |
| 8    | 357.2422           | 0.6         | C <sub>23</sub> H <sub>32</sub> O <sub>3</sub>   | Dereplication, <i>in silico</i> | 6   |
| 1    | 391.2028           | 1.7         | C <sub>23</sub> H <sub>31</sub> ClO <sub>3</sub> | Dereplication, <i>in silico</i> | 9   |

Table S8: *Psc\_Aza* biosynthetic gene cluster annotation.

| Gene name | Size (AA) | Best match Swissprot       | Global alignment (I/S/G) % | Global alignment (I/S/G) AA | Pfam domain                                                                                                                                                                 | PFAM_ID                                                                                      | Plausible_function                  | Duplicated |
|-----------|-----------|----------------------------|----------------------------|-----------------------------|-----------------------------------------------------------------------------------------------------------------------------------------------------------------------------|----------------------------------------------------------------------------------------------|-------------------------------------|------------|
| Psc_Aza_A | 2584      | <a href="#">Q0CF75</a>     | 65/77/7                    | 1744/2076/185               | beta-ketoacyl synthase<br>acyl transferase<br>polyketide synthase dehydratase<br>methyltransferase<br>enoylreductase<br>ketoreductase<br>phosphopantetheine attachment site | PF00109.26<br>PF00698.21<br>PF14765.6<br>PF08242.12<br>IPR020843<br>PF00107.26<br>PF08659.10 | Highly reducing polyketide synthase | N          |
| Psc_Aza_B | 2726      | <a href="#">A0A0K0MCJ4</a> | 67/78/5                    | 1870/2188/129               | beta-ketoacyl synthase<br>acyl transferase<br>phosphopantetheine attachment site<br>methyltransferase<br>terminal domain                                                    | PF16073.5<br>PF00109.26<br>PF00698.21<br>PF00550.25<br>IPR013120                             | Non reducing polyketide synthase    | N          |
| Psc_Aza_C | 352       | <a href="#">Q0CF72</a>     | 44/55/32                   | 208/256/152                 | FAD-binding domain_3                                                                                                                                                        | PF01494.19                                                                                   | Monooxygenase FAD dependant         | N          |
| Psc_Aza_D | 449       | <a href="#">A0A084B9Z3</a> | 34/50/8                    | 162/239/40                  | transferase                                                                                                                                                                 | PF02458                                                                                      | Acyltransferase                     | N          |
| Psc_Aza_E | 471       | <a href="#">Q0CF74</a>     | 49/66/4                    | 232/318/18                  | FAD binding domain                                                                                                                                                          | PF01565.23                                                                                   | FAD-linked oxidoreductase           | N          |
| Psc_Aza_F | 341       | No reviewed protein        |                            |                             | zinc-binding dehydrogenase,<br>alcohol dehydrogenase GroES-like                                                                                                             | PF00107.26<br>PF08240.12                                                                     | Dehydrogenase                       | N          |
| Psc_Aza_G | 385       | No reviewed protein        |                            |                             | alcohol dehydrogenase GroES-like                                                                                                                                            | PF08240.12                                                                                   | Alcohol dehydrogenase               | N          |
| Psc_Aza_H | 561       | <a href="#">Q0CCX4</a>     | 55/68/8                    | 318/392/43                  | tryptophan halogenase                                                                                                                                                       | PF04820.14                                                                                   | FAD-dependant halogenase            | N          |
| Psc_Aza_I | 590       | No reviewed protein        |                            |                             |                                                                                                                                                                             |                                                                                              | Unknow function                     | N          |
| Psc_Aza_J | 227       | No reviewed protein        |                            |                             | amine oxidoreductase                                                                                                                                                        | PF01593.24                                                                                   | Amine oxidase                       | N          |
| Psc_Aza_K | 306       | No reviewed protein        |                            |                             | G protein-coupled glucose receptor                                                                                                                                          | PF11970.8                                                                                    | G protein-coupled receptor          | N          |
| Psc_Aza_L | 590       | No reviewed protein        |                            |                             | major facilitator                                                                                                                                                           | PF07690.16                                                                                   | Efflux pump                         | N          |
| Psc_Aza_M | 407       | No reviewed protein        |                            |                             |                                                                                                                                                                             |                                                                                              | Unknow function                     | N          |

I: identity, S: similarity, G: gap

Figure S4: Cluster comparison of azaphilone biosynthetic gene clusters described in literature with the putative azaphilone biosynthetic gene cluster of *Penicillium sclerotiorum* SNB-CN111. Only functions of tailoring enzyme related to *P. sclerotiorum* are annotated. BGC identifier are accession number from MIBIG repository. Clinker Software (<https://github.com/gamcil/clinker>).

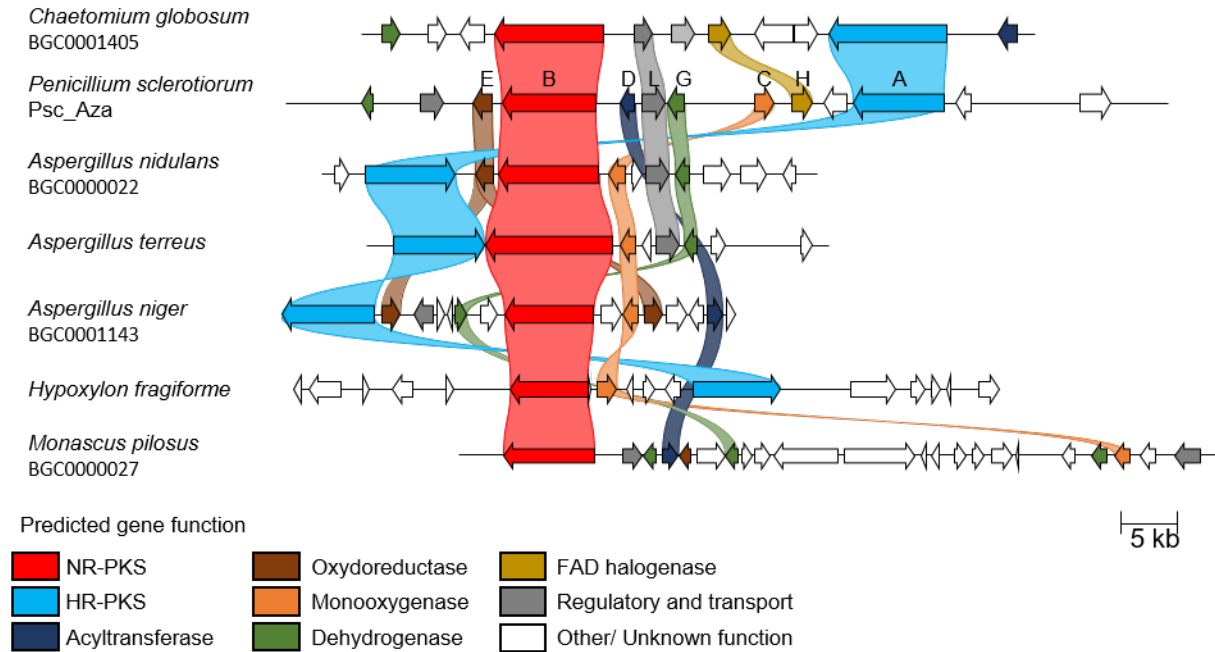

Figure S5: MS/MS spectra of  $[10+H]^+$  and the corresponding fragmentation scheme.

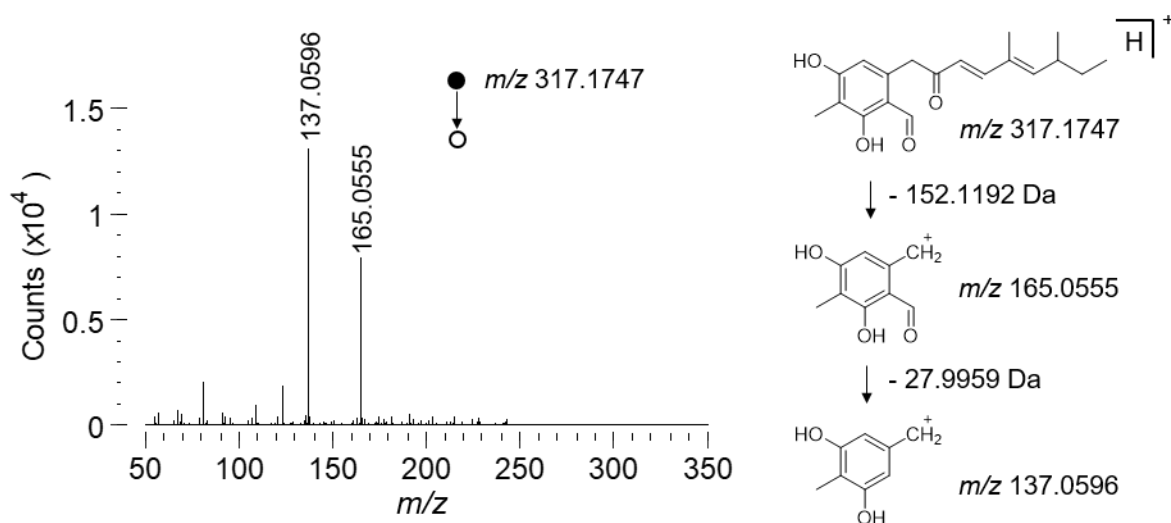

Figure S6: MS/MS spectra of  $[11+H]^+$  and the corresponding fragmentation scheme.

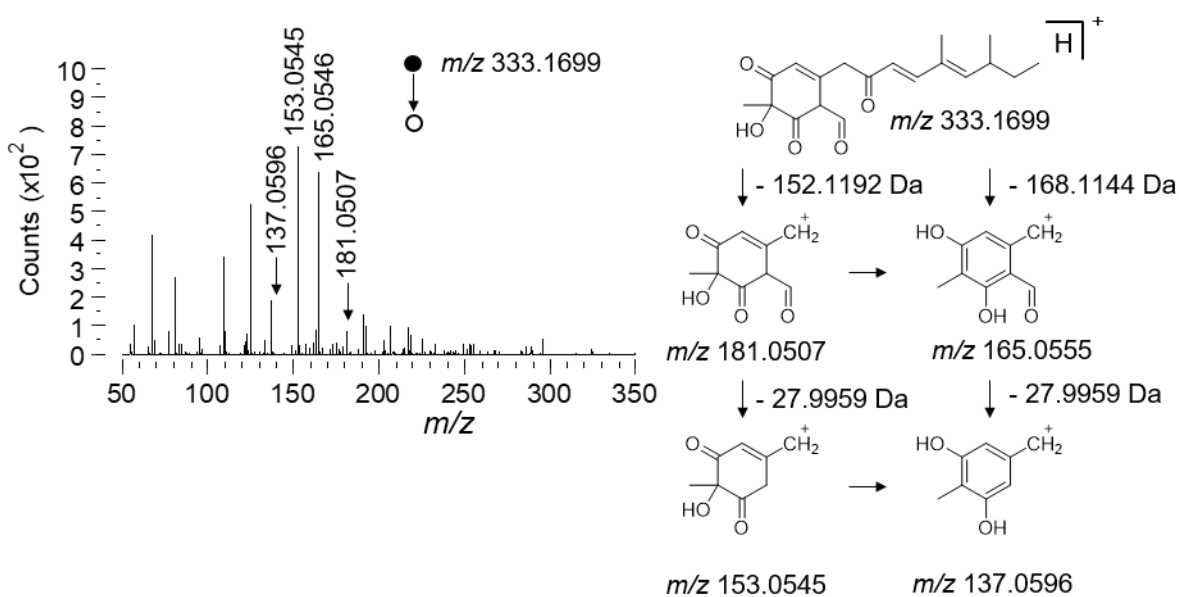

Figure S7: MS/MS spectra of  $[12+H]^+$  and the corresponding fragmentation scheme.

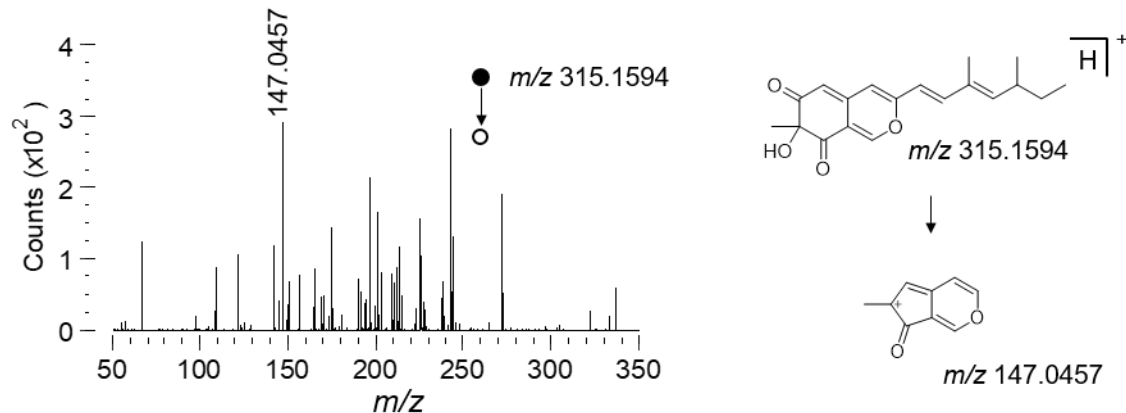

Figure S8: Comparison of intermediates **12** and **21** fragmentation spectra with their common neutral losses corresponding to H/Cl differences.

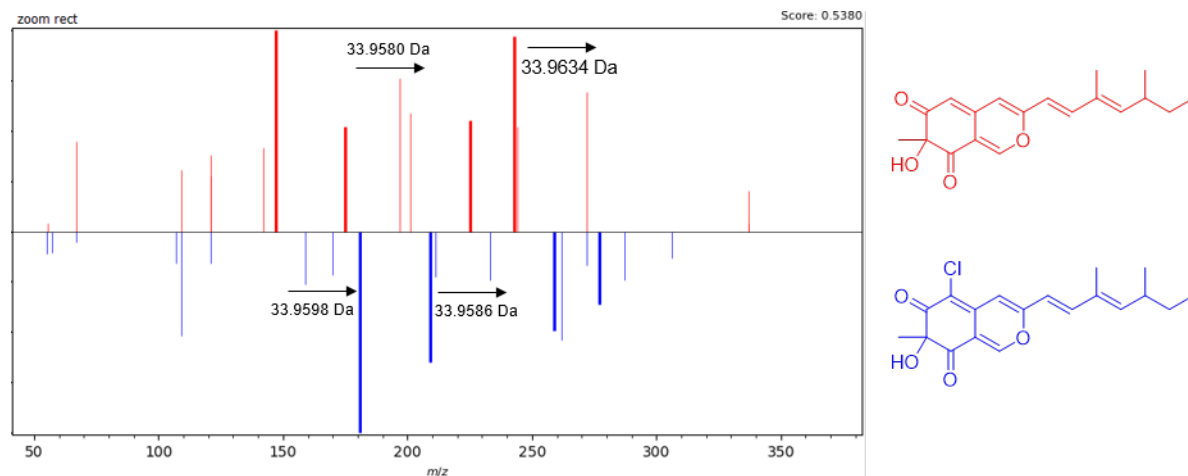

Table S9: Annotated azaphilones from *P. sclerotiorum* crude extract and fractions, synthesized by *Psc\_Aza* biosynthetic pathway.

| CN111 |                    |             |                                                  |                                     |            |
|-------|--------------------|-------------|--------------------------------------------------|-------------------------------------|------------|
| ID    | [M+H] <sup>+</sup> | Error (ppm) | Formula                                          | Identification                      | Ref        |
| 10    | 317.1747           | 0.1         | C <sub>19</sub> H <sub>24</sub> O <sub>4</sub>   | Manual annotation, <i>in silico</i> | This study |
| 11    | 333.1699           | -0.8        | C <sub>19</sub> H <sub>24</sub> O <sub>5</sub>   | Manual annotation, <i>in silico</i> | This study |
| 12    | 315.1594           | -1          | C <sub>19</sub> H <sub>22</sub> O <sub>4</sub>   | Manual annotation, <i>in silico</i> | 12         |
| 21    | 349.1205           | -1.1        | C <sub>19</sub> H <sub>21</sub> ClO <sub>4</sub> | Dereplication, <i>in silico</i>     | 1          |
| 13    | 357.1705           | -2.4        | C <sub>21</sub> H <sub>24</sub> O <sub>5</sub>   | Dereplication, <i>in silico</i>     | 1          |
| 4     | 391.1309           | -0.6        | C <sub>21</sub> H <sub>23</sub> ClO <sub>5</sub> | Dereplication, standard             | 1, 2       |
| 19    | 361.2021           | -3.2        | C <sub>21</sub> H <sub>28</sub> O <sub>5</sub>   | Manual annotation, <i>in silico</i> | This study |
| 20    | 395.1626           | -1.6        | C <sub>21</sub> H <sub>27</sub> ClO <sub>5</sub> | Dereplication, <i>in silico</i>     | 1, 2       |
| 15    | 381.1691           | 1.5         | C <sub>23</sub> H <sub>24</sub> O <sub>5</sub>   | Dereplication, <i>in silico</i>     | 1, 2       |
| 6     | 415.1312           | -1.3        | C <sub>23</sub> H <sub>23</sub> ClO <sub>5</sub> | Dereplication, standard             | 1, 2       |
| 16    | 383.1859           | -1.6        | C <sub>23</sub> H <sub>26</sub> O <sub>5</sub>   | Dereplication, <i>in silico</i>     | 1, 2       |
| 17    | 417.1467           | -0.9        | C <sub>23</sub> H <sub>25</sub> ClO <sub>5</sub> | Dereplication, <i>in silico</i>     | 1, 2       |

Figure S9: Extracted ion chromatogram of halogenated ilicicolins from scaffold A (H, Cl and Br) with their isotopic patterns.

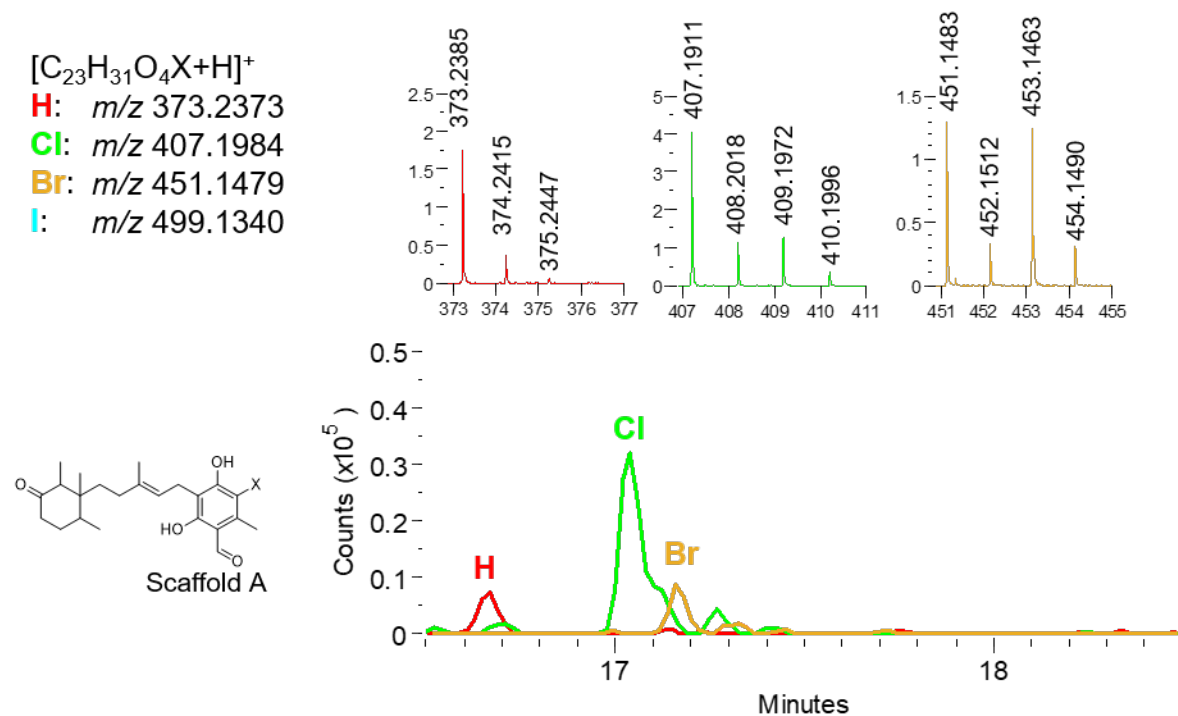

Figure S10: Extracted ion chromatogram of halogenated ilicicolins from scaffold B (H, Cl and Br) with their isotopic patterns.

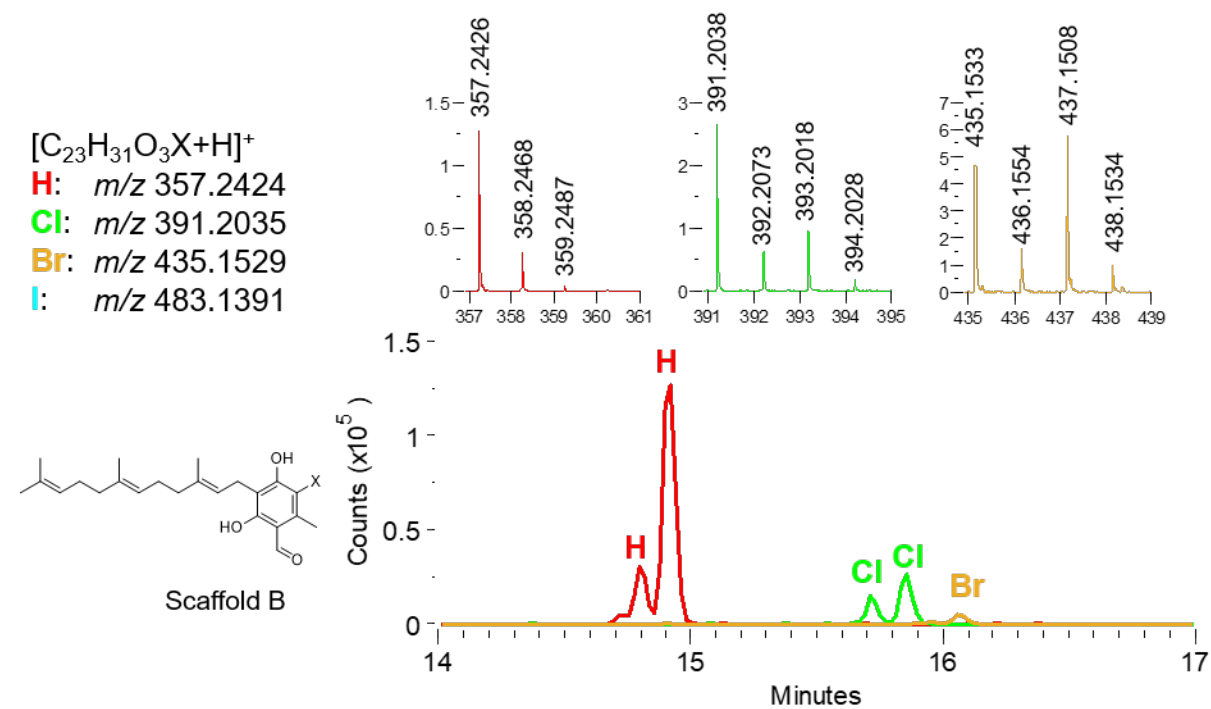

Figure S11: Extracted ion chromatogram of halogenated azaphilones from scaffold B' (H, Cl, Br and I) with their isotopic patterns.

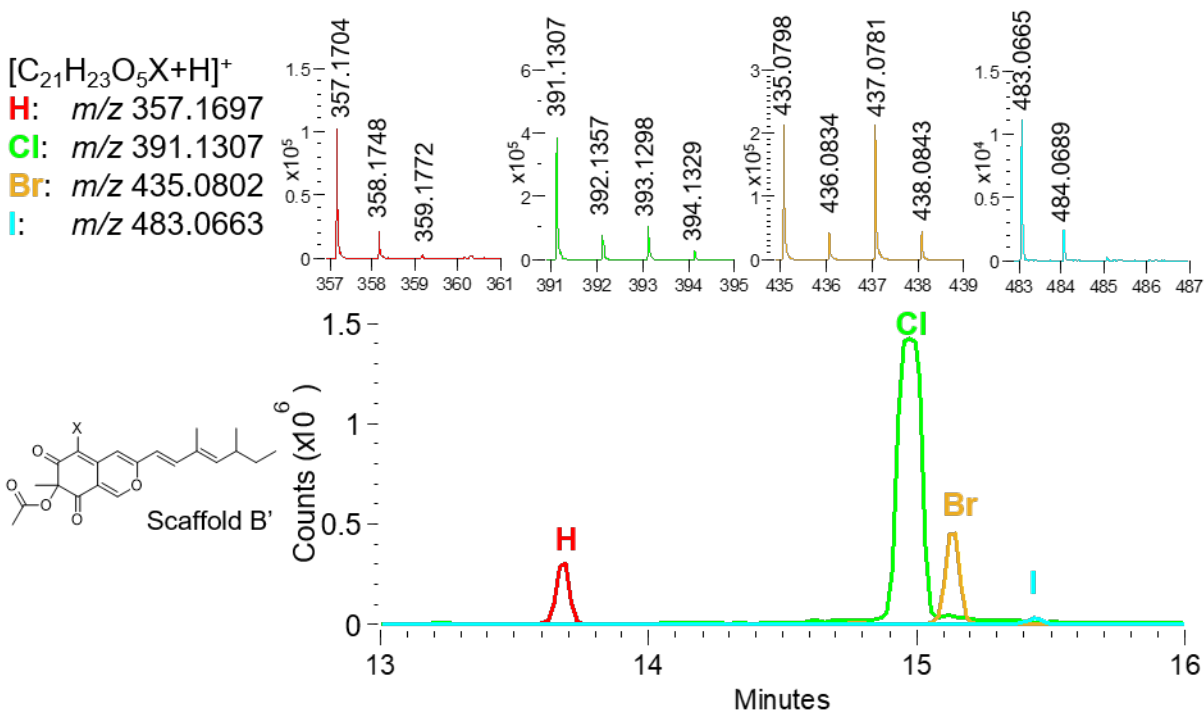

Figure S12: Extracted ion chromatogram of halogenated azaphilones from scaffold C' (H, Cl, Br and I) with their isotopic patterns.

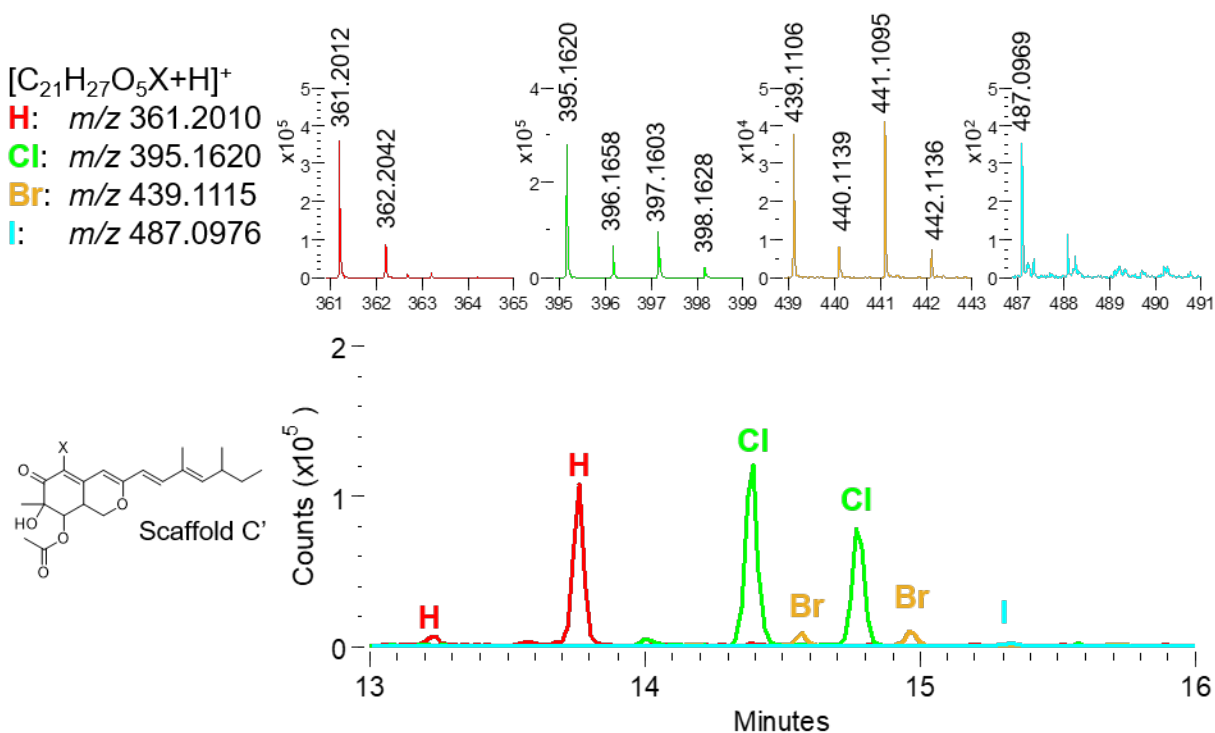



Figure S13: Extracted ion chromatogram of halogenated azaphilones from scaffold D' (H, Cl, Br and I) with their isotopic patterns.

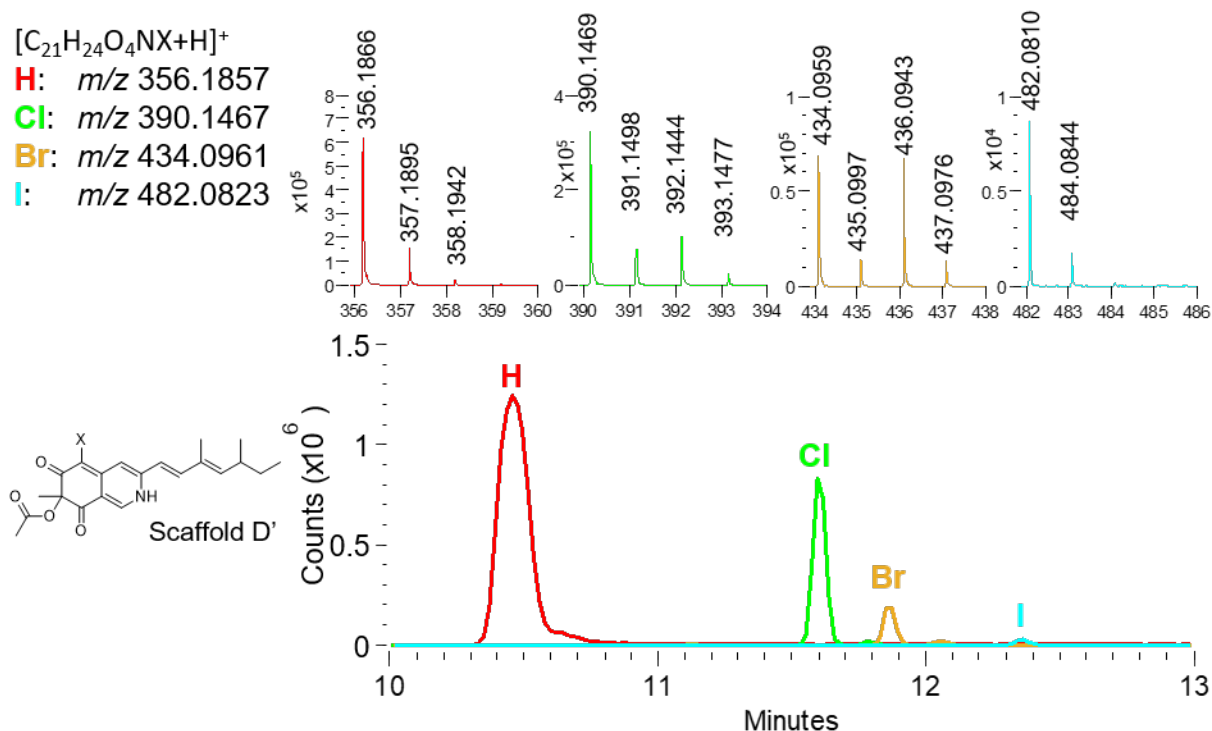

Figure S14: Extracted ion chromatogram of halogenated azaphilones from scaffold E' (H, Cl, Br and I) with their isotopic patterns.

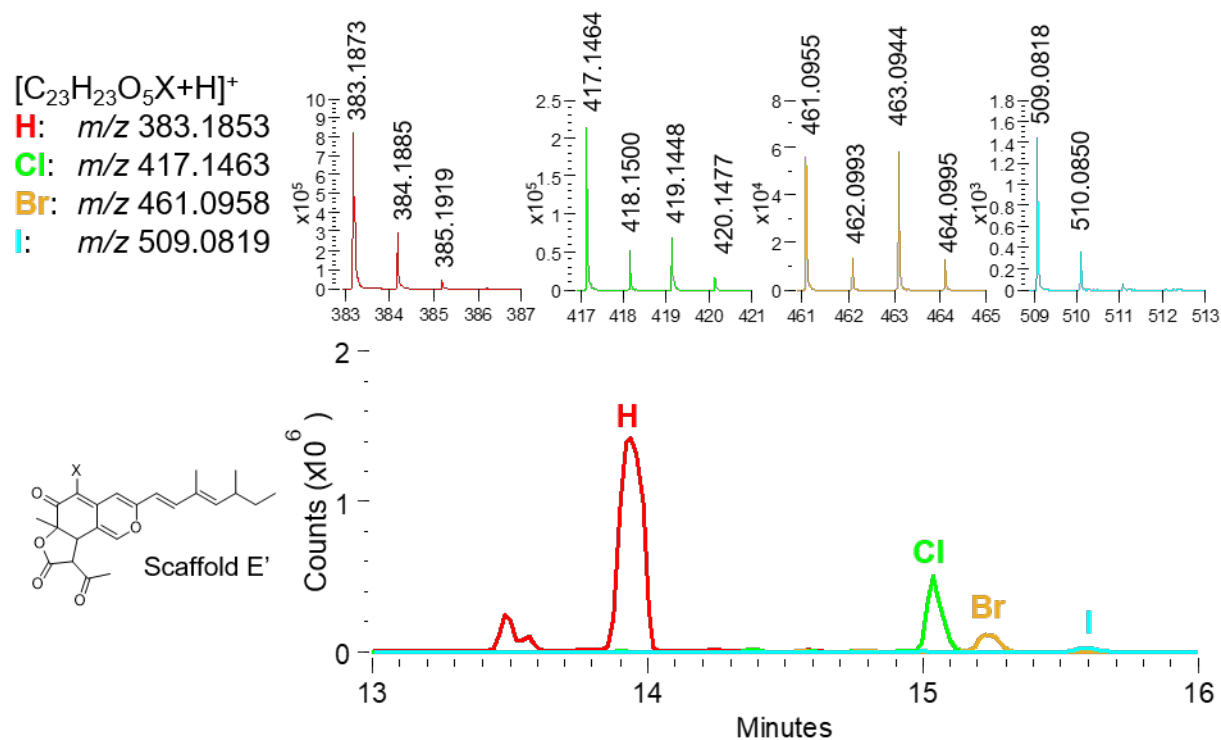

Figure S15: HRMS of compound **22**.

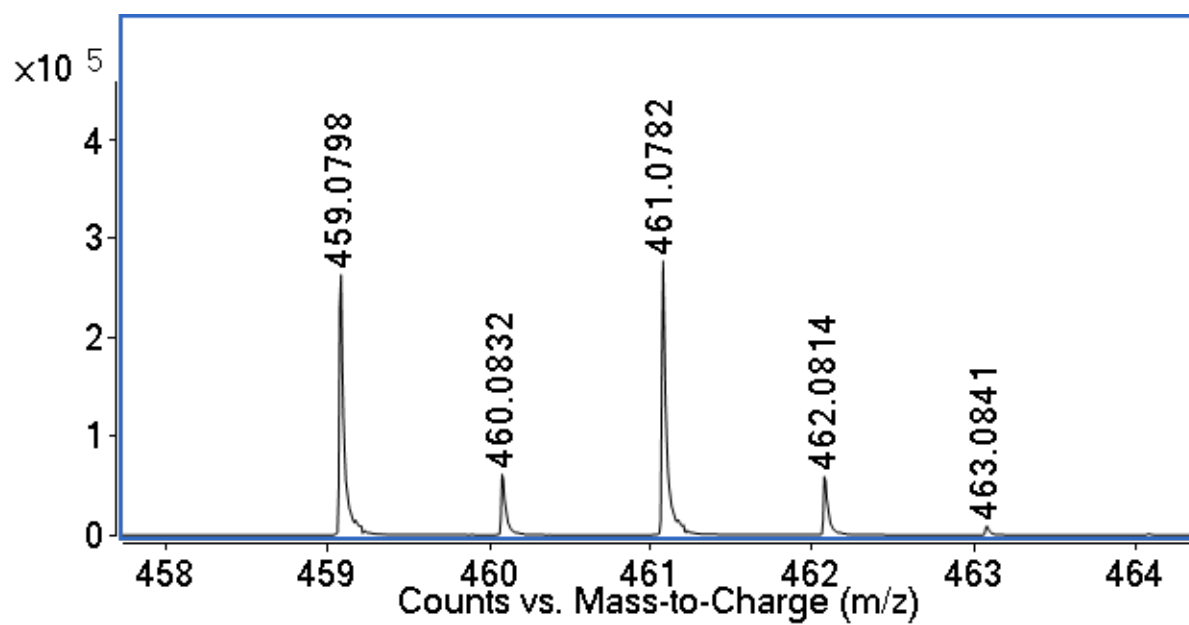

Table S10: Comparative <sup>1</sup>H NMR spectroscopic data for compounds **22** (isolated during this study), sclerotiorin (**4**) sclerotioramine (**5**) and 5-chloroisorotiorin (**6a**) isolated by our group (reference 20 of the manuscript) and **6b** and **15** (from literature)

Position

|    | <b>22</b>                    | <b>4</b>                       | <b>5</b>                       | <b>6a</b>         | <b>6b</b>                      | <b>15</b>         |
|----|------------------------------|--------------------------------|--------------------------------|-------------------|--------------------------------|-------------------|
|    | DMF- <i>d</i> 7 <sup>a</sup> | CDCl <sub>3</sub> <sup>b</sup> | CDCl <sub>3</sub> <sup>b</sup> | MeOD <sup>c</sup> | CDCl <sub>3</sub> <sup>b</sup> | MeOD <sup>c</sup> |
| 1  | 8.82, s                      | 7.90, s                        | 7.93, s                        | 8.88, s           | 8.84, s                        | 8.88, s           |
| 4  | 6.98, s                      | 6.61, s                        | 6.86, s                        | 6.81, s           | 6.16, s                        | 6.81, s           |
| 5  |                              |                                |                                |                   | 6.34, s                        |                   |
| 9  | 6.78, d(16.1)                | 6.51, d(15.9)                  | 6.13, d(16.1)                  | 6.35, d(15.6)     | 5.97, d(15.8)                  | 6.35, d(15.6)     |
| 10 | 7.26, d(16.2)                | 7.03, d(15.9)                  | 7.04, d(16.7)                  | 7.19, (16.0)      | 7.04, d(15.8)                  | 7.19, d(16.0)     |
| 12 | 5.87, d(10.2)                | 5.67, d(10.0)                  | 5.69, d(9.9)                   | 5.77, d(9.8)      | 5.67, d(9.9)                   | 5.77, d(9.8)      |
| 13 | 2.55, m                      | 2.45, m                        | 2.47, m                        | 2.53, m           | 2.48, m                        | 2.52, m           |
| 14 | 1.45/1.34, m                 | 1.29/1.39, m                   | 1.30/1.40, m                   | 1.34/1.46, m      | 1.35, m                        | 1.46/1.34, m      |
| 15 | 0.87, t(7.4)                 | 0.83, t(7.5)                   | 0.84, t(7.5)                   | 0.89, t(7.6)      | 0.85, t(7.5)                   | 0.89, t(7.6)      |
| 16 | 1.02, d(6.7)                 | 0.98, d(6.8)                   | 0.99, d(6.8)                   | 1.03, d(6.6)      | 1.00, d(6.7)                   | 1.03, d(6.6)      |
| 17 | 1.92, s                      | 1.81, s                        | 1.83, s                        | 1.88, s           | 1.81, s                        | 1.88, s           |
| 18 | 1.72, s                      | 1.53, s                        | 1.57, s                        | 1.68, s           | 1.69, s                        | 1.68, s           |
| 20 |                              | 2.13, s                        | 2.16, s                        |                   |                                |                   |
| 5" | 2.57, s                      |                                |                                | 2.55, s           | 2.59, s                        | 2.55, s           |

<sup>a</sup> DMF-*d*7, 700 MHz, this study

<sup>b</sup> CDCl<sub>3</sub>, no indication<sup>13</sup>

<sup>c</sup> MeOD, 500 MHz<sup>1</sup>

Table S11: Comparative  $^{13}\text{C}$  NMR spectroscopic data for compounds **22** (isolated during this study), sclerotiorin (**4**) and sclerotioramine (**5**) isolated by our group (reference 20 of the manuscript) and **6b** and **15** (from literature)

|    | <b>22</b>                    | <b>4</b>                       | <b>5</b>                       | <b>6b</b>                      | <b>15</b>                      |
|----|------------------------------|--------------------------------|--------------------------------|--------------------------------|--------------------------------|
|    | DMF- <i>d</i> 7 <sup>a</sup> | CDCl <sub>3</sub> <sup>b</sup> | CDCl <sub>3</sub> <sup>b</sup> | CDCl <sub>3</sub> <sup>b</sup> | CDCl <sub>3</sub> <sup>c</sup> |
| 1  | 153.2 CH                     | 152.8 CH                       | 138.4 CH                       | 153.1, CH                      | 151.9, CH                      |
| 3  | 159.7, C                     | 158.4, C                       | 146.3, C                       | 156.3, C                       | 158.0, C                       |
| 4  | 109.5, CH                    | 110.8, CH                      | 110.3, CH                      | 108.2, CH                      | 105.5, CH                      |
| 4a | 143.4, C                     | 138.8, C                       | 147.1, C                       | 123.1, C                       | 139.4, C                       |
| 5  | 100.8, C                     | 106.6, C                       | 101.5, C                       | 105.3, CH                      | 108.7, C*                      |
| 6  | 184.5, C                     | 186.0, C                       | 183.7, C                       | 189.9, C                       | 194.1, C                       |
| 7  | 88.4, C                      | 84.7, C                        | 85.4, C                        | 87.5, C                        | 87.4, C                        |
| 8  | 164.2, C                     | 192.0, C                       | 193.3, C                       | 165.6, C                       | 163.6, C                       |
| 8a | 112.1, C                     | 114.8, C                       | 114.2, C                       | 110.7, C                       | 110.2, C*                      |
| 9  | 118.1, CH                    | 115.9, CH                      | 116.4, CH                      | 115.4, CH                      | 115.6, CH                      |
| 10 | 143.6, CH                    | 143.0, CH                      | 142.9, CH                      | 144.1, CH                      | 143.5, CH                      |
| 11 | 133.9, C                     | 132.2, C                       | 132.0, C                       | 131.8, C                       | 131.9, C                       |
| 12 | 149.1, CH                    | 149.0, CH                      | 148.7, CH                      | 148.3, CH                      | 149.2, CH                      |
| 13 | 35.9, CH                     | 35.3, CH                       | 35.1, CH                       | 35.5, CH                       | 35.1, CH                       |
| 14 | 30.3, CH <sub>2</sub>        | 30.2, CH <sub>2</sub>          | 30.6, CH <sub>2</sub>          | 30.0, CH <sub>2</sub>          | 29.8, CH <sub>2</sub>          |
| 15 | 12.5, CH <sub>3</sub>        | 12.1, CH <sub>3</sub>          | 12.0, CH <sub>3</sub>          | 11.9, CH <sub>3</sub>          | 11.8, CH <sub>3</sub>          |
| 16 | 20.8, CH <sub>3</sub>        | 20.2, CH <sub>3</sub>          | 20.1, CH <sub>3</sub>          | 20.1, CH <sub>3</sub>          | 20.0, CH <sub>3</sub>          |
| 17 | 12.9, CH <sub>3</sub>        | 12.5, CH <sub>3</sub>          | 12.4, CH <sub>3</sub>          | 12.4, CH <sub>3</sub>          | 12.2, CH <sub>3</sub>          |
| 18 | 26.4, CH <sub>3</sub>        | 22.7, CH <sub>3</sub>          | 23.6, CH <sub>3</sub>          | 26.4, CH <sub>3</sub>          | 26.1, CH <sub>3</sub>          |
| 19 |                              | 170.3, C                       | 170.9, C                       |                                |                                |
| 20 |                              | 20.3, CH <sub>3</sub>          | 20.6, CH <sub>3</sub>          |                                |                                |
| 2' | 169.4, C                     |                                |                                | 168.3, C                       | 167.7, C                       |
| 3' | 124.8, C                     |                                |                                | 142.3, C                       | 123.7, C                       |
| 4' | 195.2, C                     |                                |                                | 194.4, C                       | 182.9, C                       |
| 5' | 30.5, CH <sub>3</sub>        |                                |                                | 30.0, CH <sub>3</sub>          | 29.9, CH <sub>3</sub>          |

<sup>a</sup> DMF-*d*7, 700 MHz, this study.

<sup>b</sup> CDCl<sub>3</sub>, no indication<sup>13</sup>

<sup>c</sup> CDCl<sub>3</sub>, 100 MHz<sup>14</sup>

\*Authors indicate that these assignments were interchangeable.

Figure S16:  $^1\text{H}$  NMR spectrum (700 MHz,  $\text{DMF-d}_7$ ) of compound **22**.

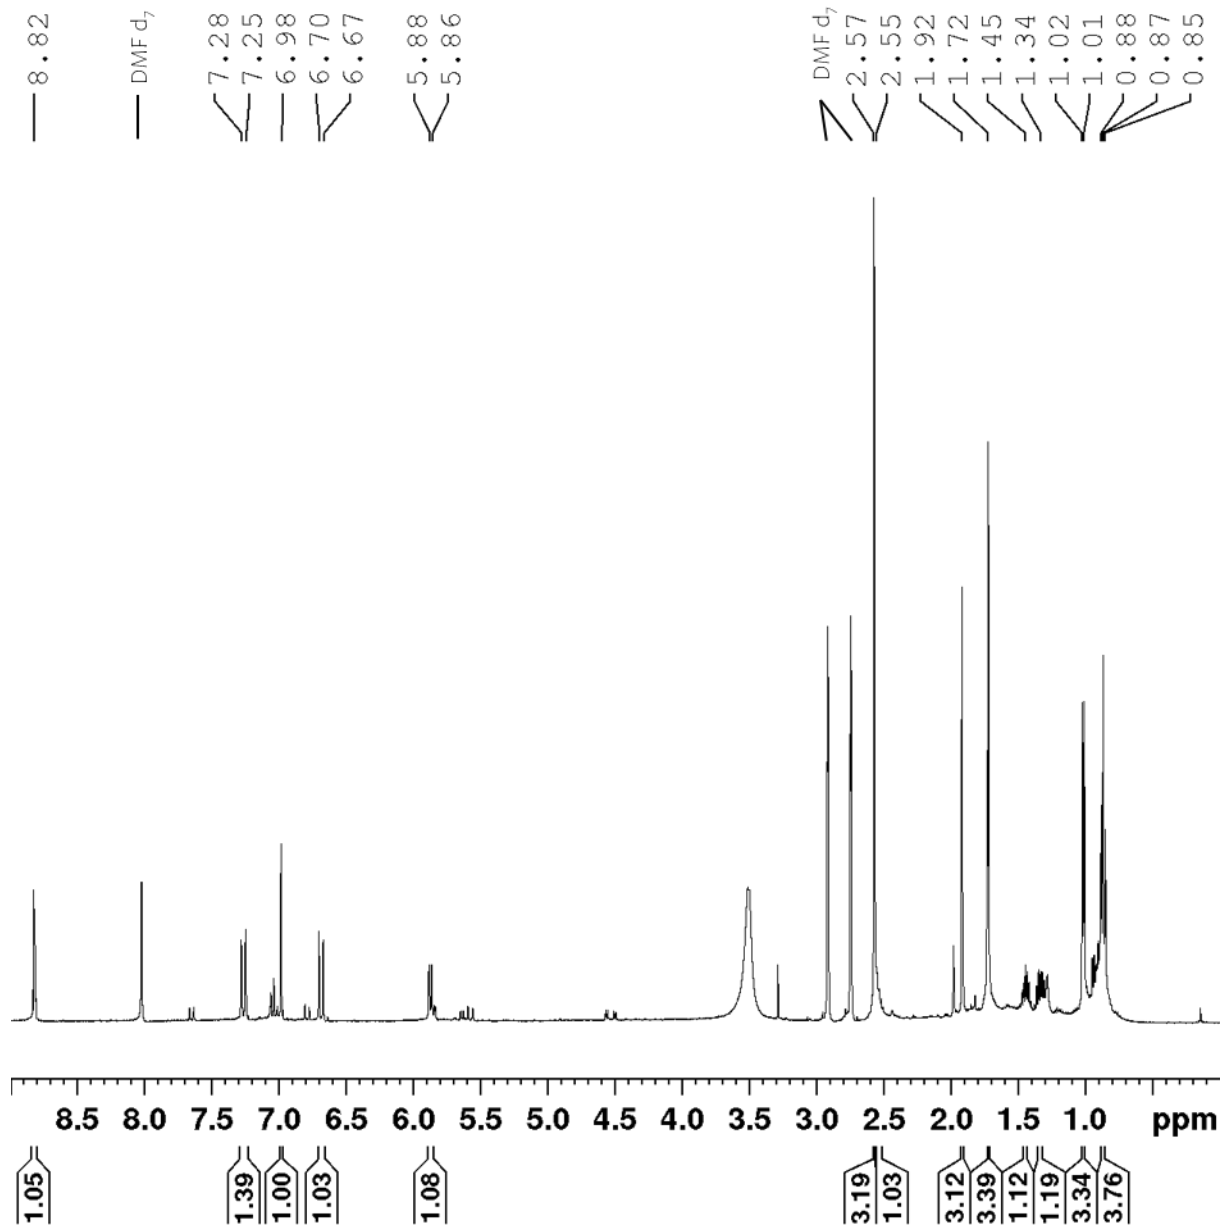

Figure S17:  $^{13}\text{C}$  NMR spectrum (175 MHz, DMF- $d_7$ ) of compound **22**.

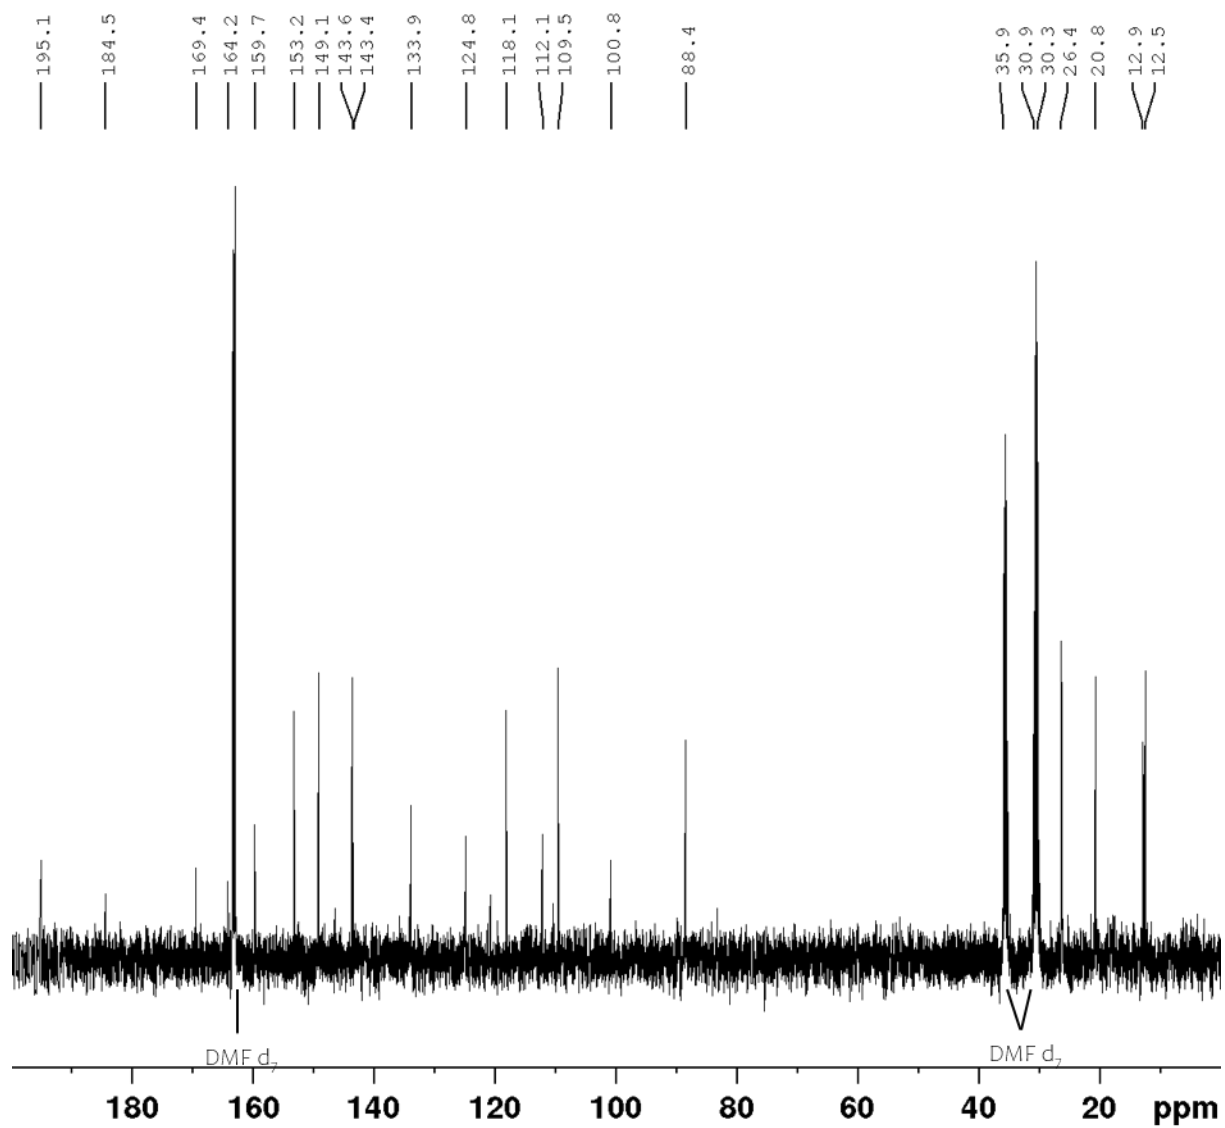

Figure S18: COSY NMR spectrum (700 MHz, DMF-*d*7) of compound **22**.

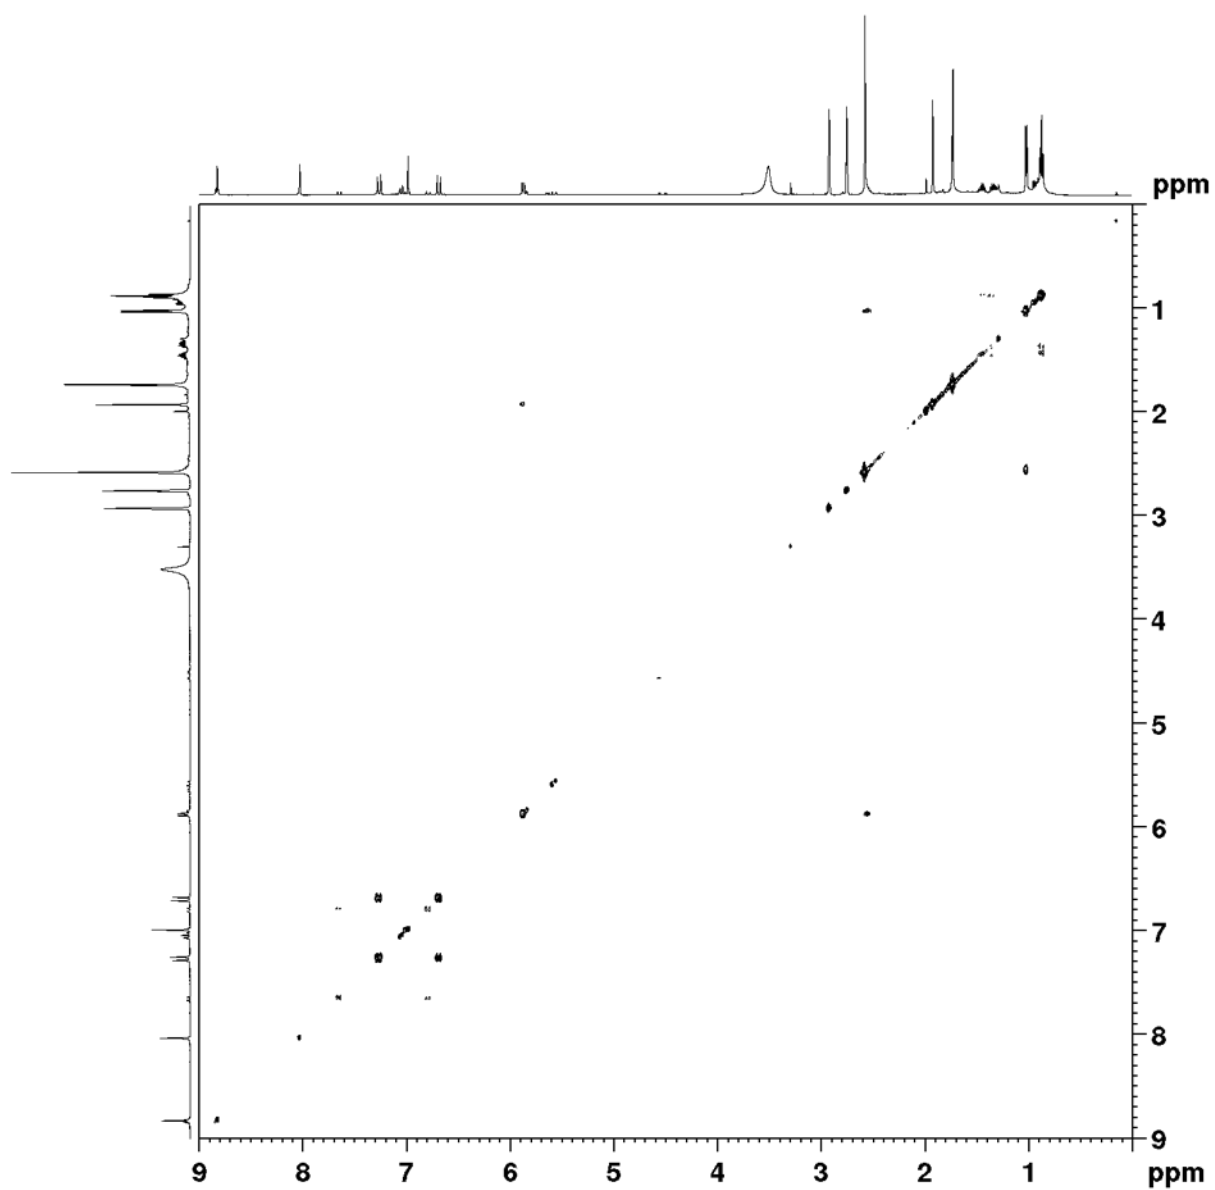

Figure S19: HSQC NMR spectrum (700 MHz, DMF-*d*<sub>7</sub>) of compound **22**.

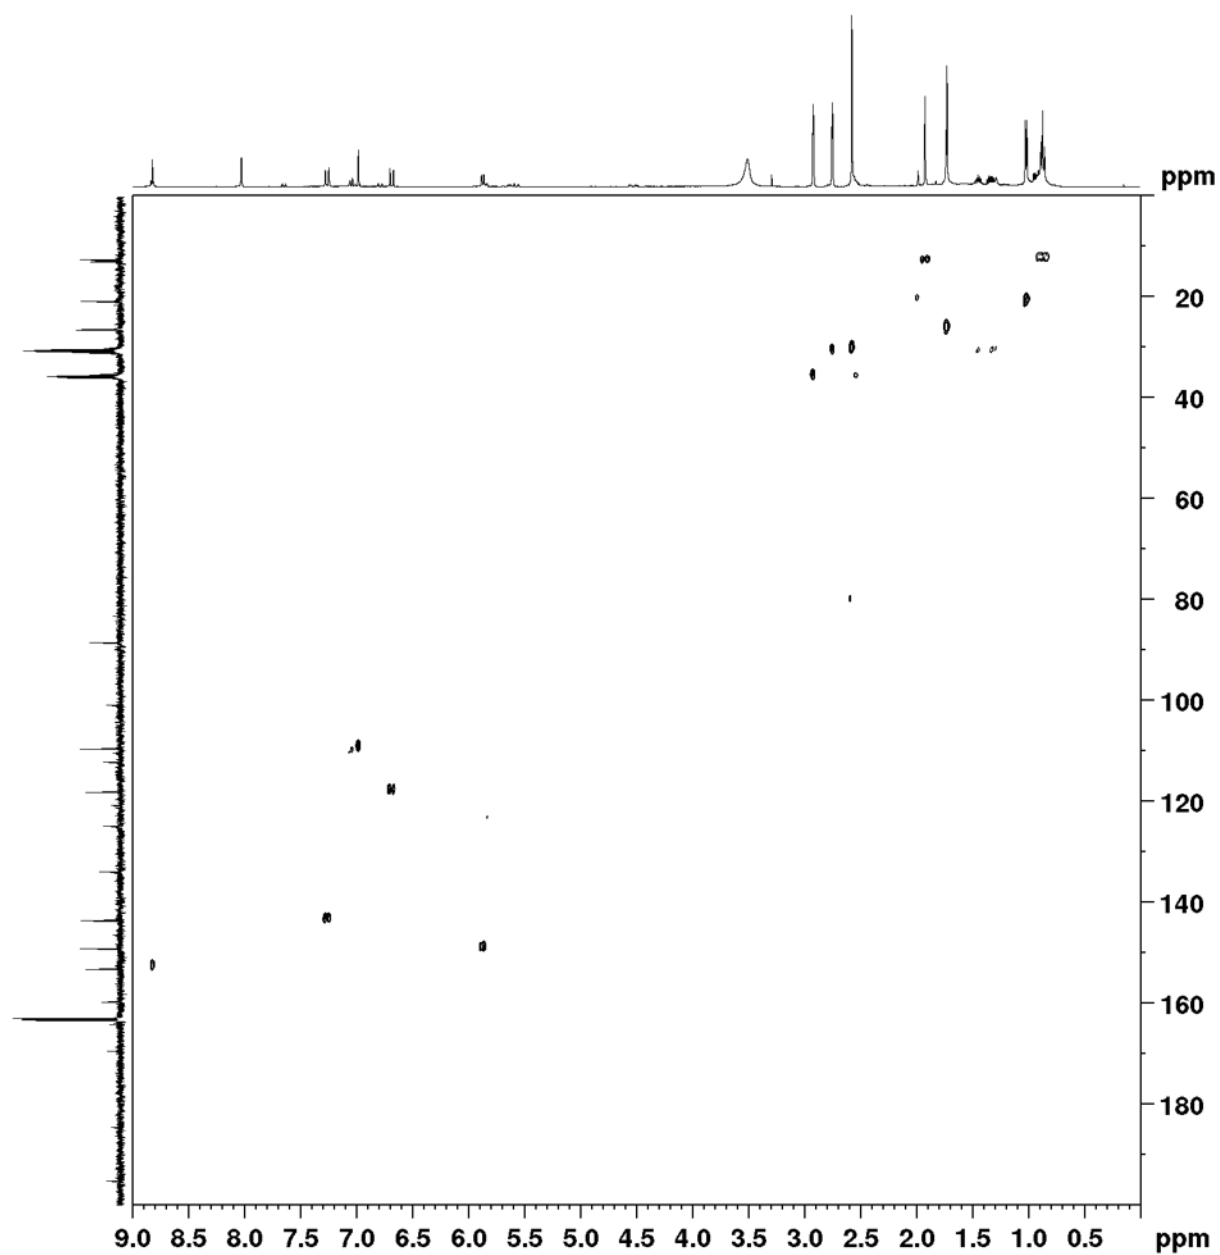



Figure S20: HMBC NMR spectrum (700 MHz, DMF-*d*<sub>7</sub>) of compound **22**.

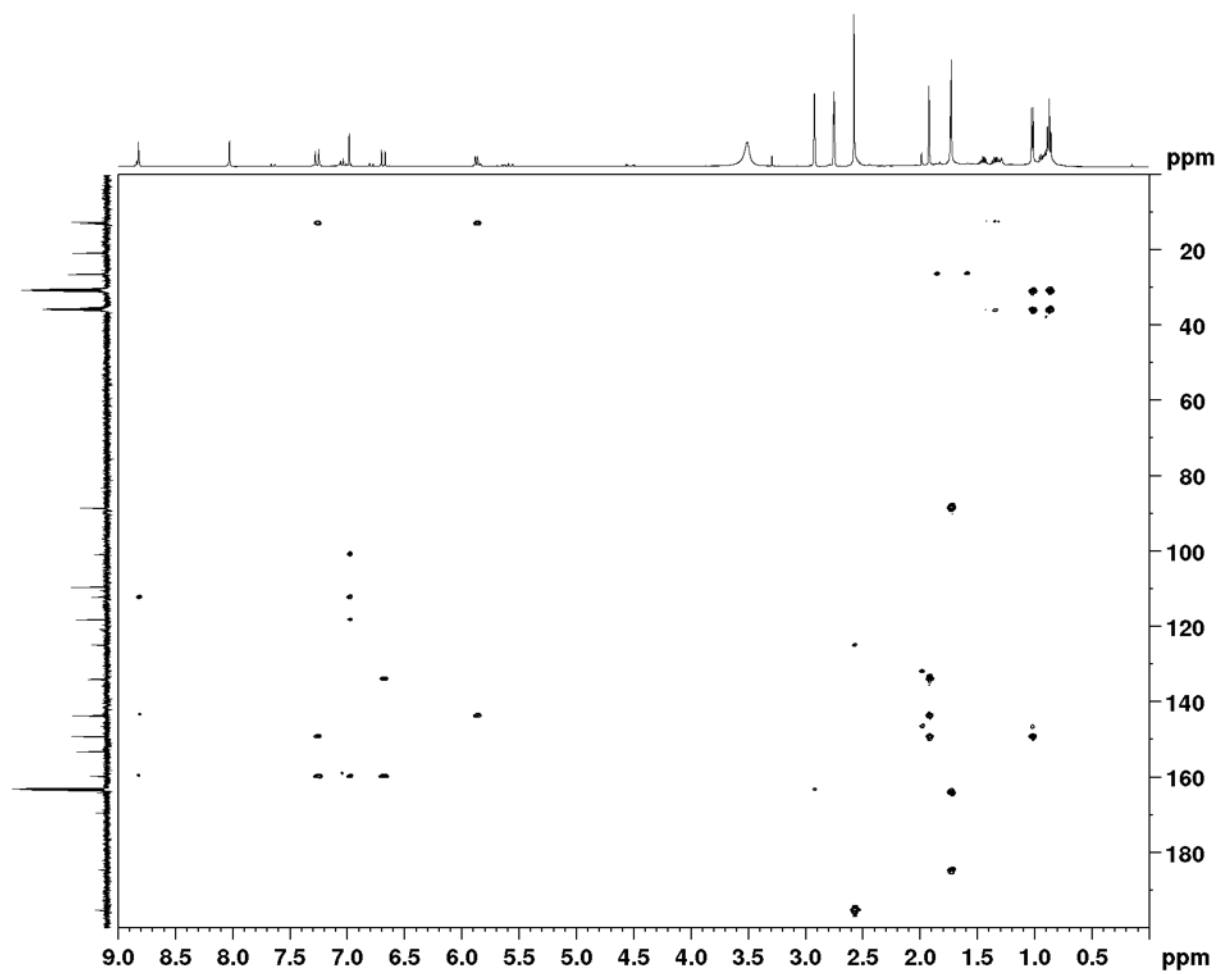

Figure S21: UV spectra in methanol of isolated azaphilone **22**

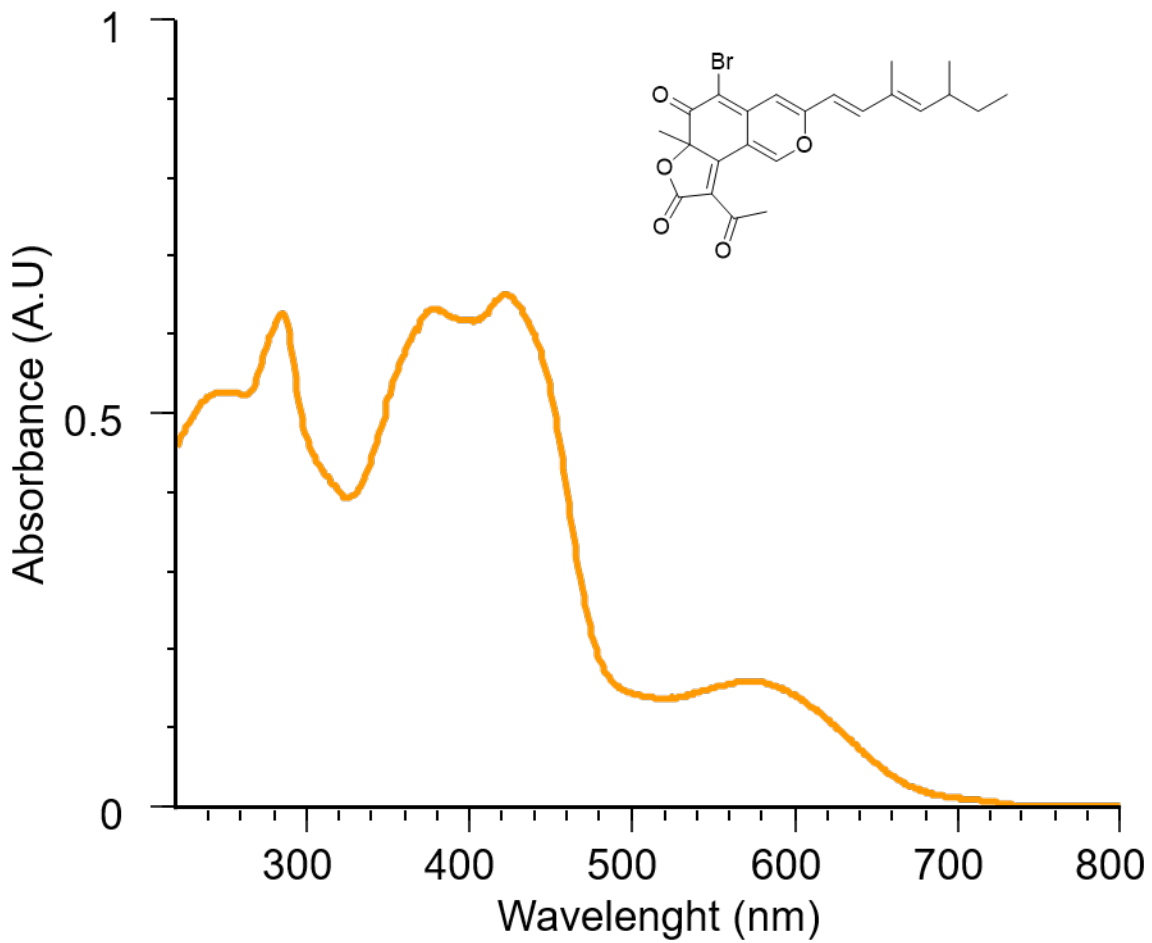

## References

1. Hebra, T. *et al.* Dereplication, Annotation, and Characterization of 74 Potential Antimicrobial Metabolites from *Penicillium sclerotiorum* Using t-SNE Molecular Networks. *Metabolites*, **11**, 444 (2021).
2. Gao, J.-M., Yang, S.-X. & Qin, J.-C. Azaphilones: Chemistry and Biology. *Chem. Rev.*, **113**, 4755–4811 (2013).
3. Liu, Z. *et al.* Identification of anti-inflammatory polyketides from the coral-derived fungus *Penicillium sclerotiorum*: In vitro approaches and molecular-modeling. *Bioorg. Chem.*, **88**, 102973 (2019).
4. Son, S. *et al.* Structures and biological activities of azaphilones produced by *Penicillium* sp. KCB11A109 from a ginseng field. *Phytochemistry*, **122**, 154–164 (2016).
5. Arai, N. *et al.* Isochromophilones III -VI, Inhibitors of Acyl-CoA: Cholesterol Acyltransferase Produced by *Penicillium multicolor* FO-3216. *J. Antibiot.*, **48**, 696–702 (1995).
6. Aldridge, D. C. *et al.* Metabolites of *Nectria coccinea*. *J. Chem. Soc.*, **1** 2136 (1972) doi:10.1039/p19720002136.
7. Sorres, J., Sabri, A., Brel, O., Stien, D. & Eparvier, V. Illicicolinic acids and illicicolinal derivatives from the fungus *Neonectria discophora* SNB-CN63 isolated from the nest of the termite *Nasutitermes corniger* found in French Guiana show antimicrobial activity. *Phytochemistry*, **151**, 69–77 (2018).
8. Nirma, C., Eparvier, V. & Stien, D. Antibacterial Illicicolinic Acids C and D and Illicicolinal from *Neonectria discophora* SNB-CN63 Isolated from a Termite Nest. *J. Nat. Prod.*, **78**, 159–162 (2015).
9. Li, Y., Liu, D., Cen, S., Proksch, P. & Lin, W. Isoindolinone-type alkaloids from the sponge-derived fungus *Stachybotrys chartarum*. *Tetrahedron*, **70**, 7010–7015 (2014).
10. Takamatsu, S. *et al.* A Novel Testosterone 5.ALPHA.-Reductase Inhibitor, 8',9'-Dehydroascochlorin Produced by *Verticillium* sp. FO-2787. *Chem. Pharm. Bull.*, **42**, 953–956 (1994).
11. Mori, K. & Takechi, S. Synthesis of the natural enantiomers of ascochlorin, ascofuranone and ascofuranol. *Tetrahedron*, **41**, 3049–3062 (1985).
12. Huang, X., Zhang, W., Tang, S., Wei, S. & Lu, X. Collaborative Biosynthesis of a Class of Bioactive Azaphilones by Two Separate Gene Clusters Containing Four PKS/NRPSs with Transcriptional Crosstalk in Fungi. *Angew. Chem. Int. Ed.*, **59**, 4349–4353 (2020).
13. Matsuzaki, K., Tahara, H., Inokoshi, J., Tanaka, H., Masuma, R., Omura, S. New Brominated and Halogen-less Derivatives and Structure-activity Relationship of Azaphilones Inhibiting gp120-CD4 Binding. *J. Antibiot.*, **51**, 1004–1011 (1998)
14. Pairet, L., Wrigley, K., Chetland, I., Reynolds, E.E., Hayes, M.A., Holloway, J., Ainsworth, A.M., Katzer, W., Cheng, X.-M., Hupe, D.J., Charlton, P., Doherty, A.M. New Brominated and Halogen-less Derivatives and Structure-activity Relationship of Azaphilones Inhibiting gp120-CD4 Binding. *J. Antibiot.*, **48**, 913–923 (1995)
